# Supplementary material
Source: publisher figshare collection journal article supplement (https://acs.figshare.com/ndownloader/files/5129449)
Supplement: Supplementary file 1 [file 5129449]

# Direct C-Arylation of Free (NH)-Indoles and Pyrroles Catalyzed by Ar-Rh(III) Complexes Assembled In Situ

Xiang Wang, Benjamin S. Lane, Dalibor Sames\*

*Department of Chemistry, Columbia University, 3000 Broadway, New York, New York, 10027*

## Supporting Information

**Materials and General Methods.** Small-scale (<100 mg) arylation reactions were carried out in capped glass vials (VWR, 8 mL) equipped with a Teflon-coated septum, heated in a 34-well reaction block (Chemglass). Large-scale (>1g) arylation reactions were performed in resalable pressure tubes equipped with a Teflon cap and glass plunger (Ace glass), heated in an oil bath. NMR spectra were obtained on a Bruker spectrometer operating at 400 MHz or 300 MHz for  $^1\text{H}$  NMR, 100 MHz or 75 MHz for  $^{13}\text{C}\{^1\text{H}\}$  NMR and 121MHz for  $^{31}\text{P}$  NMR in  $\text{CDCl}_3$  unless otherwise noted. IR spectra were obtained on a Bomen MB-100 FT IR spectrometer. Gas chromatography was performed on an Agilent Technologies 6890N gas chromatograph equipped with a 25 m polydimethylsiloxane capillary column and 5973 Mass Selective Detector. Flash column chromatography was performed employing 200-400 mesh silica gel (EM). Thin layer chromatography (TLC) was performed on silica gel 60 F<sub>254</sub> eluting with a 5:1 mixture of hexanes and ethyl acetate unless noted otherwise.  $[\text{4-(CF}_3\text{)C}_6\text{H}_4\text{]}_3\text{P}$  (**L**)<sup>1</sup> and  $[\text{Rh}(\text{coe})_2\text{Cl}]_2$  (**1**)<sup>2</sup> were synthesized employing known procedures and were as effective as those obtained commercially from Strem.  $\text{CsOPiv}$ ,<sup>3</sup> 1-indole- $d_1$ ,<sup>4</sup> 2-indole- $d_1$ <sup>5</sup> and 3-indole- $d_1$ <sup>5</sup> were synthesized employing known procedures. 1,4-dioxane (Anhydrous, Aldrich), haloarenes (Aldrich) and all other reagents were obtained commercially and used as received.

**Table 1.** Complete Substrate and Functional Group Scope.<sup>a</sup>

| Entry | Azole                                                                               | Product                                                                              | Isolated Yield          |
|-------|-------------------------------------------------------------------------------------|--------------------------------------------------------------------------------------|-------------------------|
| 1     | 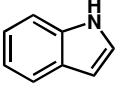   |     | 82%                     |
| 2     |    |     | 75% <sup>b</sup>        |
| 3     |    |    | 89%                     |
| 4     |    |    | 87%<br>88% <sup>c</sup> |
| 5     |    |    | 78%                     |
| 6     |    |     | 59%                     |
| 7     |    |    | 76%                     |
| 8     |    |     | 65%                     |
| 9     |   |   | 74%<br>72% <sup>c</sup> |
| 10    |  |  | 58%                     |
| 11    |  |   | 59%                     |
| 12    |  |   | 81%                     |
| 13    |  |   | 78%                     |
| 14    |  |  | 67%                     |
| 15    |  |   | 44%                     |

<sup>a</sup> Reaction conditions: 1 equiv of azole, ArI (1.2 equiv), CsOPiv (1.4 equiv), **1** (2.5 mol%), L (15 mol%), Dioxane/120 °C/18-36h, L= [p-(CF<sub>3</sub>)-C<sub>6</sub>H<sub>4</sub>]<sub>3</sub>P. <sup>b</sup> 1.17 g indole, **1** (1 mol%), L (6 mol%), all reagents weighed in air, 120 °C/56 h. <sup>c</sup> All reagents weighed in air.

## Synthesis of Functionalized Indole Substrates

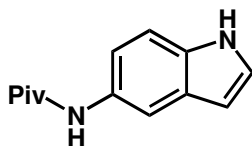

***N*-(5-Indolyl)-2,2-dimethyl-propionamide:** Trimethyl acetyl chloride (300 mg, 2.29 mmol) was added to the mixture of 5-aminoindole (264 mg, 2.00 mmol), triethylamine (1 mL) and CH<sub>2</sub>Cl<sub>2</sub> (5 mL). The resulting suspension was stirred at room temperature for 3 h, quenched by H<sub>2</sub>O (10 mL), extracted (EtOAc, 10 mL×3), dried (MgSO<sub>4</sub>) and concentrated. Ether (15 mL) was then added to precipitate colorless needles, which were further washed by ether (10 mL×3) to give *N*-(5-indolyl)-2,2-dimethyl-propionamide (298 mg, 69%) as white needles. <sup>1</sup>H NMR (300 MHz, DMSO-*d*<sub>6</sub>): δ 10.98 (s, 1 H), 9.02 (s, 1 H), 7.79 (s, 1 H), 7.20-7.30 (m, 3 H), 6.36 (s, 1 H), 1.24 (s, 9 H). <sup>13</sup>C NMR (75 MHz, DMSO-*d*<sub>6</sub>): δ 175.4, 132.4, 130.7, 127.0, 125.4, 116.1, 112.1, 110.5, 100.8, 27.5. LRMS (APCI) for C<sub>13</sub>H<sub>17</sub>N<sub>2</sub>O (MH<sup>+</sup>) calcd (found): 217.13 (217.23).

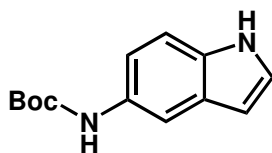

***N*-(5-Indolyl)-carbamic acid tert-butyl ester:** A solution of 5-aminoindole (264 mg, 2.00 mmol) and di(*t*-butyl)oxide dicarbonyl (450 mg, 2.06 mmol) in EtOAc (15 mL) was stirred at room temperature for 12 h, diluted (EtOAc, 30 mL), washed (H<sub>2</sub>O, 10 mL×3), dried (MgSO<sub>4</sub>) and concentrated. The resulting oil was dry loaded to a column, and flash chromatographed (2:1 Hexanes:EtOAc) to give *N*-(5-indolyl)-carbamic acid tert-butyl ester (441 mg, 95%) as a white solid. <sup>1</sup>H NMR (300 MHz, CDCl<sub>3</sub>): δ 8.47 (broad s, 1 H), 7.76 (broad s, 1 H), 7.16-7.27 (m, 3 H), 6.66 (broad s, 1 H), 6.53 (broad s, 1 H), 1.67 (s, 9 H). <sup>13</sup>C NMR (100 MHz, CDCl<sub>3</sub>): δ 133.2, 120.9, 128.4, 125.6, 116.2, 112.0, 111.7, 102.7, 80.6, 29.2. IR (film, cm<sup>-1</sup>): 3320, 2978, 1706, 1540, 1483, 1327, 1249, 1166, 1052, 886, 761, 719. LRMS (APCI) for C<sub>13</sub>H<sub>17</sub>N<sub>2</sub>O<sub>2</sub> (MH<sup>+</sup>) calcd (found): 233.13 (233.25).

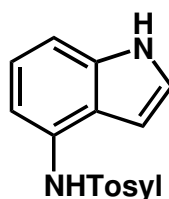

***N*-(4-Indolyl)-4-methyl-benzenesulfonamide:** A suspension of tosyl chloride (200 mg, 1.10 mmol) in CH<sub>2</sub>Cl<sub>2</sub> (1 mL) was added slowly to the suspension of 5-aminoindole (132 mg, 1.00 mmol) in CH<sub>2</sub>Cl<sub>2</sub> (1 mL) at 0 °C. The resulting mixture was warmed up to room temperature, stirred for 30 minutes, quenched (H<sub>2</sub>O, 15 mL), extracted (EtOAc, 15 mL×3), dried (MgSO<sub>4</sub>), concentrated and chromatographed (3:1→2:1 hexanes:EtOAc) to give *N*-(4-indolyl)-4-methyl-benzenesulfonamide (156 mg, 43%) as a tan solid. IR (film, cm<sup>-1</sup>): 3403, 3267, 1700, 1503, 1156, 751. <sup>1</sup>H NMR (300 MHz, methanol-*d*<sub>4</sub>): δ 7.66 (d, *J* = 8.1 Hz, 2 H), 7.24 (d, *J* = 8.1 Hz, 2 H), 7.16 (d, *J* = 3.6 Hz, 1 H), 7.04 (t, *J* = 7.8 Hz, 1 H), 6.96 (d, *J* = 7.5 Hz, 1 H), 6.46 (d, *J* = 3.0 Hz, 1 H), 2.39 (s, 3 H). <sup>13</sup>C NMR (75 MHz, methanol-*d*<sub>4</sub>): δ 143.6, 137.7, 137.6, 129.3, 129.0, 127.3, 124.3, 123.6, 121.3, 114.0, 109.1, 99.0. LRMS (APCI) for C<sub>15</sub>H<sub>15</sub>N<sub>2</sub>O<sub>2</sub>S (MH<sup>+</sup>) calcd (found): 287.09 (287.25).

### Arylation of Indoles and Pyrroles: Representative Procedures

**Small scale:** In an argon-filled glovebox, indole (29.3 mg, 0.25 mmol), **1** (4.5 mg, 6.3  $\mu$ mol), [4-(CF<sub>3</sub>)C<sub>6</sub>H<sub>4</sub>]<sub>3</sub>P (**L**, 18.0 mg, 39  $\mu$ mol), CsOPiv (82.0 mg, 0.35 mmol) and PhI (61.0 mg, 0.30 mmol) were charged into a vial, followed by the addition of 1,4-dioxane (0.2 mL). The vial was capped, brought out the glovebox, and heated at 120 °C in a reaction block for 24 h. The reaction mixture was cooled to room temperature, and passed through a short plug of silica gel (3cm×0.5cm, L×ID), eluting with EtOAc (10 mL). The resulting solution was concentrated, dry loaded to a column, and flash chromatographed (15:1, hexanes:EtOAc) to give 2-phenyl indole (39.6 mg, 82%) as a white powder.

**Small scale (Reagents weighed in air):** On benchtop, **1** (4.5 mg, 6.3  $\mu$ mol), [4-(CF<sub>3</sub>)C<sub>6</sub>H<sub>4</sub>]<sub>3</sub>P (**L**, 18.0 mg, 39  $\mu$ mol), CsOPiv (82.0 mg, 0.35 mmol), 5-bromoindole (49.0 mg, 0.25 mmol) and 4-iodoanisole (70.2 mg, 0.30 mmol) were rapidly charged into a vial. The vial was subsequently capped, evacuated with a needle through the septum, refilled with argon, and 1,4-dioxane (0.2 mL) was then added via a syringe through the septum. The vial was then heated at 120 °C in a reaction block for 24h. The reaction mixture was cooled to room temperature, and passed through a short plug of silica gel (3cm×0.5cm, L×ID), eluting with EtOAc (10 mL). The resulting solution was concentrated, dry loaded to a column, and flash chromatographed (8:1→5:1, hexanes:EtOAc) to give 5-bromo-2-(4-methoxyphenyl) indole (53.5 mg, 72%) as a pale yellow solid.

**Gram scale:** On bench top, a mixture of indole (1.17g, 10.0 mmol), **1** (71.7 mg, 0.10 mmol), [4-(CF<sub>3</sub>)C<sub>6</sub>H<sub>4</sub>]<sub>3</sub>P (279 mg, 0.30 mmol), CsOPiv (3.26 g, 14.0 mmol) and PhI (2.45 g, 12.0 mmol) were charged into into a 20 mL threaded pressure tube (Ace glass). The tube was then capped, evacuated, refilled with argon, and 1,4-dioxane (8 mL) was added under a flow of argon. The tube was purged with argon for 2 min, capped and heated at 120 °C with vigorous stirring. After 52h, the reaction mixture were cooled to room temperature and filtered through a plug of silica gel (4cm×5cm, L×ID), eluting with EtOAc (30 mL). The resulting solution was concentrated to give a dark colored solid.

This solid was then washed with hexanes/ether (50:1, 10mL×3) afforded 2-phenyl indole (1.45g, 75%) as a tan powder (>98% pure by GC-MS).

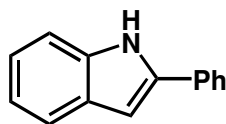

**2-Phenyl indole:**<sup>6</sup> <sup>1</sup>H NMR (300 MHz, DMSO-*d*<sub>6</sub>): δ 11.6 (s, 1 H), 7.87 (d, *J* = 8.4 Hz, 2 H), 7.52 (d, *J* = 7.8 Hz, 1 H), 7.41-7.49 (m, 3 H), 7.29-7.34 (m, 1 H), 7.09-7.14 (m, 1 H), 6.99-7.04 (m, 1 H), 6.91 (d, *J* = 0.9 Hz, 1 H). <sup>13</sup>C NMR (75 MHz, DMSO-*d*<sub>6</sub>): δ 131.3, 136.8, 131.9, 128.3, 127.0, 124.7, 121.2, 119.7, 110.1, 111.0, 98.4. IR (film, cm<sup>-1</sup>): 3435, 1451, 741, 689. LRMS (APCI) for C<sub>14</sub>H<sub>12</sub>N (MH<sup>+</sup>) calcd (found): 194.10 (194.21).

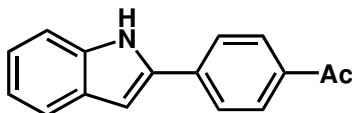

**2-(4-Acetylphenyl)-indole:**<sup>6</sup> <sup>1</sup>H NMR (300 MHz, acetone-*d*<sub>6</sub>): δ 10.91 (s, 1 H), 8.05-8.16 (m, 4 H), 7.69 (d, *J* = 5.1 Hz, 1 H), 7.52 (d, *J* = 5.1 Hz, 1 H), 7.24 (t, *J* = 6.6 Hz, 1 H), 7.17-7.26 (m, 2 H), 2.70 (s, 3 H). <sup>13</sup>C NMR (75 MHz, acetone-*d*<sub>6</sub>): δ 196.7, 138.3, 137.2, 137.0, 136.2, 129.5, 129.4, 125.2, 123.0, 121.0, 120.3, 111.8, 101.5, 26.2. IR (film, cm<sup>-1</sup>): 3351, 1669, 1602, 1427, 1192, 791. LRMS (APCI) for C<sub>16</sub>H<sub>14</sub>NO (MH<sup>+</sup>) calcd (found): 236.11 (236.26).

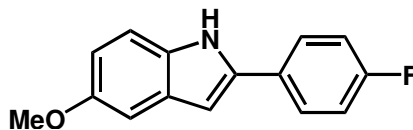

**2-(4-Fluoro-phenyl)-5-methoxy-indole:** <sup>1</sup>H NMR (300 MHz, DMSO-*d*<sub>6</sub>): δ 11.39 (s, 1 H), 7.86 (dd, *J* = 2.7, 8.7 Hz, 2 H), 7.26-7.32 (m, 3 H), 7.01 (d, *J* = 1.5 Hz, 1 H), 6.73-6.77 (m, 2 H), 3.75 (s, 3 H). <sup>13</sup>C NMR (75 MHz, DMSO-*d*<sub>6</sub>): δ 162.6, 159.4, 153.2, 136.8, 131.9, 128.7, 126.5 (d, *J*<sub>F-C</sub> = 7.8 Hz), 115.5 (d, *J*<sub>F-C</sub> = 21.4 Hz), 111.6 (d, *J*<sub>F-C</sub> = 8.7 Hz), 101.3, 98.4, 55.2. IR (film, cm<sup>-1</sup>): 3432, 1589, 1425, 1213, 792. LRMS (APCI) for C<sub>15</sub>H<sub>13</sub>N (MH<sup>+</sup>) calcd (found): 242.10 (242.25).

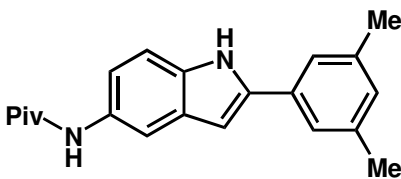

***N*-[2-(3,5-dimethyl-phenyl)-1H-5-indolyl]-2,2-dimethyl-propionamide:**  $^1\text{H}$  NMR (300 MHz,  $\text{DMSO}-d_6$ ):  $\delta$  11.31 (s, 1 H), 8.99 (s, 1 H), 7.76 (s, 1 H), 7.45 (s, 2 H), 7.23-7.25 (m, 2 H), 6.92 (s, 1 H), 6.78 (s, 1 H), 2.33 (s, 3 H), 1.24 (s, 9 H).  $^{13}\text{C}$  NMR (75 MHz,  $\text{DMSO}-d_6$ ):  $\delta$  176.8, 139.1, 138.7, 134.8, 132.9, 132.3, 129.7, 129.2, 123.6, 117.7, 112.9, 111.5, 99.4, 28.3, 21.9. IR (film,  $\text{cm}^{-1}$ ): 3331, 2993, 1702, 1508, 1150. LRMS (APCI) for  $\text{C}_{21}\text{H}_{25}\text{N}_2\text{O}$  ( $\text{MH}^+$ ) calcd (found): 321.20 (321.37).

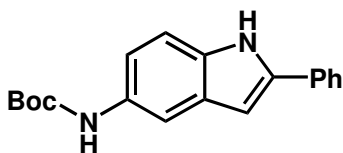

**(2-Phenyl-5-indolyl)-carbamic acid *tert*-butyl ester:**  $^1\text{H}$  NMR (300 MHz,  $\text{CDCl}_3$ ):  $\delta$  8.29 (s, 1 H), 7.63-7.67 (m, 3 H), 7.43 (t,  $J = 7.5$  Hz, 3 H), 7.26-7.34 (m, 2 H), 7.09 (dd,  $J = 1.8, 8.7$  Hz, 1 H), 6.74 (d,  $J = 1.5$  Hz, 1 H), 6.46 (s, 1 H).  $^{13}\text{C}$  NMR (100 MHz,  $\text{CDCl}_3$ ):  $\delta$  154.9, 139.0, 132.6, 131.6, 129.9, 129.3, 128.0, 125.5, 116.3, 111.4, 100.4, 80.5, 29.1. IR (film,  $\text{cm}^{-1}$ ): 3321, 2972, 1698, 1478, 1159, 760. LRMS (APCI) for  $\text{C}_{19}\text{H}_{21}\text{NO}_2$  ( $\text{MH}^+$ ) calcd (found): 309.16 (309.35).

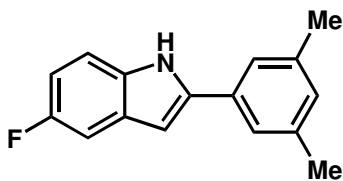

**2-(3,5-Dimethyl-phenyl)-5-fluoroindole:**  $^1\text{H}$  NMR (300 MHz,  $\text{CDCl}_3$ ):  $\delta$  8.29 (s, 1 H), 7.26-7.31 (m, 4 H), 7.00 (broad s, 1 H), 6.94 (dt,  $J = 2.4, 9.0$  Hz, 1H), 6.76-6.77 (m, 1 H), 2.41 (s, 3 H).  $^{13}\text{C}$  NMR (75 MHz,  $\text{CDCl}_3$ ):  $\delta$  160.1, 157.0, 140.4, 139.1, 133.6, 132.3, 130.2, 123.5, 111.8. IR (film,  $\text{cm}^{-1}$ ): 3419, 2921, 1602, 1454, 1191, 785, 675. LRMS (APCI) for  $\text{C}_{16}\text{H}_{15}\text{FN}$  ( $\text{MH}^+$ ) calcd (found): 240.12 (240.28).

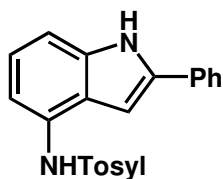

**4-Methyl-N-(2-phenyl-4-indolyl)-benzenesulfonamide:**  $^1\text{H}$  NMR (400 MHz,  $\text{CDCl}_3$ ):  $\delta$  8.41 (s, 1 H), 7.70 (d,  $J = 6.3$  Hz, 2 H), 7.58 (d,  $J = 6.9$  Hz, 2 H), 7.43 (t,  $J = 5.7$  Hz, 2 H), 7.31-7.35 (m, 1 H), 7.16-7.20 (m, 3 H), 7.06 (t,  $J = 5.7$  Hz, 1 H), 7.10 (d,  $J = 5.7$  Hz, 1 H), 6.75 (s, 1 H), 6.59 (d,  $J = 0.9$  Hz, 1 H), 2.31 (s, 3 H).  $^{13}\text{C}$  NMR (75 MHz,  $\text{DMSO}-d_6$ ):  $\delta$  143.7, 138.8, 138.2, 137.7, 132.8, 129.3, 128.5, 127.5, 127.4, 125.1, 121.7, 115.1, 109.1, 96.4, 20.3. IR (film,  $\text{cm}^{-1}$ ): 3321, 2972, 1698, 1478, 1159, 760. LRMS (APCI) for  $\text{C}_{21}\text{H}_{19}\text{N}_2\text{O}_2\text{S}$  ( $\text{MH}^+$ ) calcd (found): 363.12 (363.36).

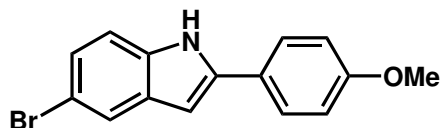

**5-Bromo-2-(4-methoxy-phenyl)-indole:**  $^1\text{H}$  NMR (300 MHz,  $\text{DMSO}-d_6$ ):  $\delta$  11.59 (s, 1 H), 7.75-7.78 (m, 2 H), 7.64 (d,  $J = 1.8$  Hz, 1 H), 7.31 (d,  $J = 7.6$  Hz, 1 H), 7.14 (dd,  $J = 1.8, 7.6$  Hz, 1 H), 7.02 (d,  $J = 8.7$  Hz, 2 H), 6.72 (d,  $J = 1.8$  Hz, 1 H), 3.80 (s, 3 H).  $^{13}\text{C}$  NMR (75 MHz,  $\text{DMSO}-d_6$ ):  $\delta$  159.8, 140.1, 136.4, 131.5, 127.4, 125.1, 124.2, 122.5, 115.3, 113.8, 112.6, 97.8, 56.3. IR (film,  $\text{cm}^{-1}$ ): 3453, 2855, 1628, 1554, 1200, 855. LRMS (APCI) for  $\text{C}_{15}\text{H}_{13}\text{BrNO}$  ( $\text{MH}^+$ ) calcd (found): 302.02, 304.02 (302.19, 304.20).

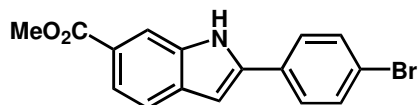

**2-(4-Bromo-phenyl)-1H-indole-6-carboxylic acid methyl ester:**  $^1\text{H}$  NMR (300 MHz,  $\text{DMSO}-d_6$ ):  $\delta$  11.98 (s, 1 H), 8.06 (s, 1 H), 7.85-7.88 (m, 2 H), 7.71-7.73 (m, 2 H), 7.64 (s, 1 H), 7.07 (d,  $J = 0.9$  Hz, 1 H), 3.89 (s, 3 H).  $^{13}\text{C}$  NMR (75 MHz,  $\text{DMSO}-d_6$ ):  $\delta$  168.0, 141.0, 137.3, 133.1, 132.9, 131.6, 128.3, 123.6, 122.2, 121.1, 120.9, 114.0, 100.7, 52.7. IR (film,  $\text{cm}^{-1}$ ): 3521, 2923, 1718, 726. LRMS (APCI) for  $\text{C}_{16}\text{H}_{14}\text{BrNO}_2$  ( $\text{MH}^+$ ) calcd (found): 330.01, 330.11 (330.15, 330.25).

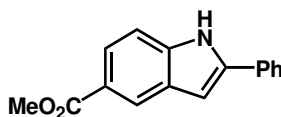

**2-Phenyl-5-indole-carboxylic acid methyl ester:**<sup>7</sup>  $^1\text{H}$  NMR (300 MHz,  $\text{CDCl}_3$ ):  $\delta$  8.57 (s, 1 H), 8.39 (s, 1 H), 7.91 (dd,  $J = 1.8, 5.4$  Hz, 1 H), 7.68 (d,  $J = 7.5$  Hz, 2 H), 7.47 (t,  $J = 4.5$  Hz, 1 H), 7.34-7.43 (m, 3 H), 6.91 (d,  $J = 1.8$  Hz, 1 H), 3.91 (s, 3 H).  $^{13}\text{C}$  NMR (75 MHz,  $\text{CDCl}_3$ ):  $\delta$  168.5, 139.7, 132.1, 129.5, 129.2, 128.6, 125.7, 124.2, 124.0, 122.8, 111.0, 101.4, 52.3. IR (film,  $\text{cm}^{-1}$ ): 3342, 1687, 755, 687. LRMS (APCI) for  $\text{C}_{16}\text{H}_{14}\text{NO}_2$  ( $\text{MH}^+$ ) calcd (found): 252.10 (252.26).

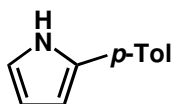

**2-(4-Tolyl)-pyrrole:**<sup>8</sup>  $^1\text{H}$  NMR (300 MHz,  $\text{CDCl}_3$ ):  $\delta$  8.38 (s, 1 H), 7.38 (d,  $J = 8.1$  Hz, 2 H), 7.18 (d,  $J = 7.8$  Hz, 2 H), 6.84-6.86 (m, 1 H), 6.48-6.51 (m, 1 H), 6.30 (dd,  $J = 2.7, 6.0$  Hz, 1 H).  $^{13}\text{C}$  NMR (75 MHz,  $\text{CDCl}_3$ ):  $\delta$  136.3, 132.7, 130.4, 130.0, 124.3, 118.8, 110.4, 105.8, 21.5. IR (film,  $\text{cm}^{-1}$ ): 3435, 1707, 1507, 1362, 1225, 1120, 907, 820, 797, 734. LRMS (APCI) for  $\text{C}_{11}\text{H}_{12}\text{N}$  ( $\text{MH}^+$ ) calcd (found): 158.10 (158.19).

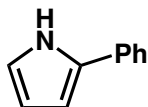

**2-Phenyl-pyrrole:**<sup>9</sup>  $^1\text{H}$  NMR (300 MHz,  $\text{DMSO}-d_6$ ):  $\delta$  8.46 (s, 1 H), 7.51-7.54 (m, 2 H), 7.39-7.45 (m, 2 H), 7.21-7.29 (m, 1 H), 6.90-6.92 (m, 1 H), 6.58-6.60 (m, 1 H), 6.36 (dd,  $J = 3.6, 8.0$  Hz, 1 H).  $^{13}\text{C}$  NMR (75 MHz,  $\text{DMSO}-d_6$ ):  $\delta$  133.2, 132.5, 133.2, 132.5, 129.3, 126.6, 124.3, 119.3, 110.5, 106.4. IR (film,  $\text{cm}^{-1}$ ): 3421, 3372, 1463, 1109, 904, 755, 725, 605. LRMS (APCI) for  $\text{C}_{10}\text{H}_{10}\text{N}$  ( $\text{MH}^+$ ) calcd (found): 144.08 (144.17).

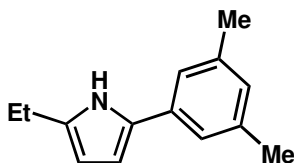

**2-(3,5-Dimethyl-phenyl)-5-ethyl-1H-pyrrole:**  $^1\text{H}$  NMR (300 MHz,  $\text{DMSO}-d_6$ ):  $\delta$  8.13 (s, 1 H), 7.09 (s, 2 H), 6.85 (s, 1 H), 6.42 (t,  $J = 3.0$  Hz, 1 H), 6.00 (t,  $J = 2.7$  Hz, 1 H),

2.72 (q,  $J = 7.5$  Hz, 2 H), 2.37 (s, 3 H), 1.33 (t,  $J = 7.5$  Hz, 3 H).  $^{13}\text{C}$  NMR (75 MHz, DMSO- $d_6$ ):  $\delta$  138.7, 135.7, 133.3, 131.2, 127.9, 106.5, 106.2, 21.8, 21.4, 14.0. IR (film,  $\text{cm}^{-1}$ ): 3404, 2968, 2916, 1602, 1503, 1322, 1193, 1036, 899, 761. LRMS (APCI) for  $\text{C}_{14}\text{H}_{18}\text{N}$  ( $\text{MH}^+$ ) calcd (found): 200.14 (200.27).

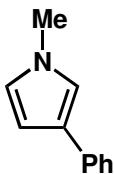

**1-Methyl-3-phenyl-pyrrole:**  $^{9-11}$   $^1\text{H}$  NMR (300 MHz,  $\text{CDCl}_3$ ):  $\delta$  7.49-7.52 (m, 2 H), 7.33 (t,  $J = 7.5$  Hz, 2 H), 7.13-7.18 (m, 1 H), 6.92 (t,  $J = 2.1$  Hz, 1 H), 6.64 (t,  $J = 2.4$  Hz, 1 H), 6.45 (t,  $J = 2.1$  Hz, 1 H), 3.71 (s, 3 H).  $^{13}\text{C}$  NMR (75 MHz,  $\text{CDCl}_3$ ):  $\delta$  136.3, 131.0, 129.0, 125.7, 125.4, 123.1, 119.0, 106.7, 36.8. IR (film,  $\text{cm}^{-1}$ ): 2914, 1704, 1605, 1211. LRMS (APCI) for  $\text{C}_{11}\text{H}_{12}\text{N}$  ( $\text{MH}^+$ ) calcd (found): 158.10 (158.23).

## Mechanistic Studies of Rh-Catalyzed Arylation of Free Azoles.

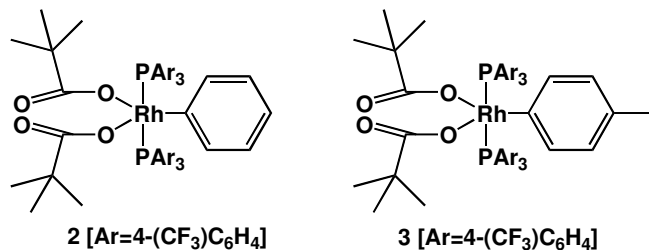

**Synthesis of Complex 2.** [Rh(coe)<sub>2</sub>Cl]<sub>2</sub> (180 mg, 0.25 mmol) and P[4-(CF<sub>3</sub>)C<sub>6</sub>H<sub>4</sub>]<sub>3</sub> (700 mg, 1.50 mmol), PhI (204 mg, 1.0 mmol), CsOPiv (930 mg, 4.0 mmol) and 1,4-dioxane (5 mL) were subsequently charged into a screw-capped vial in an argon-filled glovebox. The vial was subsequently capped, brought out the glovebox and heated at 120 °C for 10 min with vigorous stirring. The resulting yellowish mixture was then cooled to room temperature, and diluted with hexanes (15 ml). The yellow precipitation was collected on a frit, sequentially washed (hexanes/10mL×2, H<sub>2</sub>O/10mL×3, hexanes/10mL×2) and then dried on high vacuum for 60 min to give **2** (585 mg, 89%) as a fine yellowish powder. <sup>1</sup>H NMR (300 MHz, CDCl<sub>3</sub>): δ 6.72-8.30 (broad s, 24 H), 6.63 (d, *J* = 7.8 Hz, 2 H), 6.51 (t, *J* = 7.2 Hz, 1 H), 6.34 (t, *J* = 7.5 Hz, 2 H), 0.32 (s, 18 H). <sup>31</sup>P NMR (121 MHz, Dioxane-*d*<sub>8</sub>): δ 25.2 (d, *J*<sub>Rh-P</sub> = 113 Hz). IR (film, cm<sup>-1</sup>): 1712, 1609, 1400, 1323, 1131, 1062. MS (FAB) for C<sub>53</sub>H<sub>38</sub>F<sub>18</sub>O<sub>2</sub>P<sub>2</sub>Rh (M<sup>+</sup>-OPiv) calcd (found): 1213.1 (1213.2).

**Synthesis of Complex 3** was isolated in 55% yield employing a procedure analogous to that was used for **2**, with the exception that washing by hexanes was carried out at -78 °C due to the much higher solubility of **3** in organic solvents. X-ray quality crystals were grown from chloroform/hexanes solution. <sup>1</sup>H NMR (300 MHz, Dioxane-*d*<sub>8</sub>): δ 7.01-8.90 (m, 24 H), 6.65 (d, *J* = 8.1 Hz, 2 H), 6.23 (d, *J* = 8.1 Hz, 2 H), 2.09 (s, 3 H), 0.41 (s, 18 H). <sup>31</sup>P NMR (121 MHz, Dioxane-*d*<sub>8</sub>): δ 24.8 (d, *J*<sub>Rh-P</sub> = 113 Hz). IR (film, cm<sup>-1</sup>): 1717, 1610, 1480, 1325, 1172, 1133, 1063.

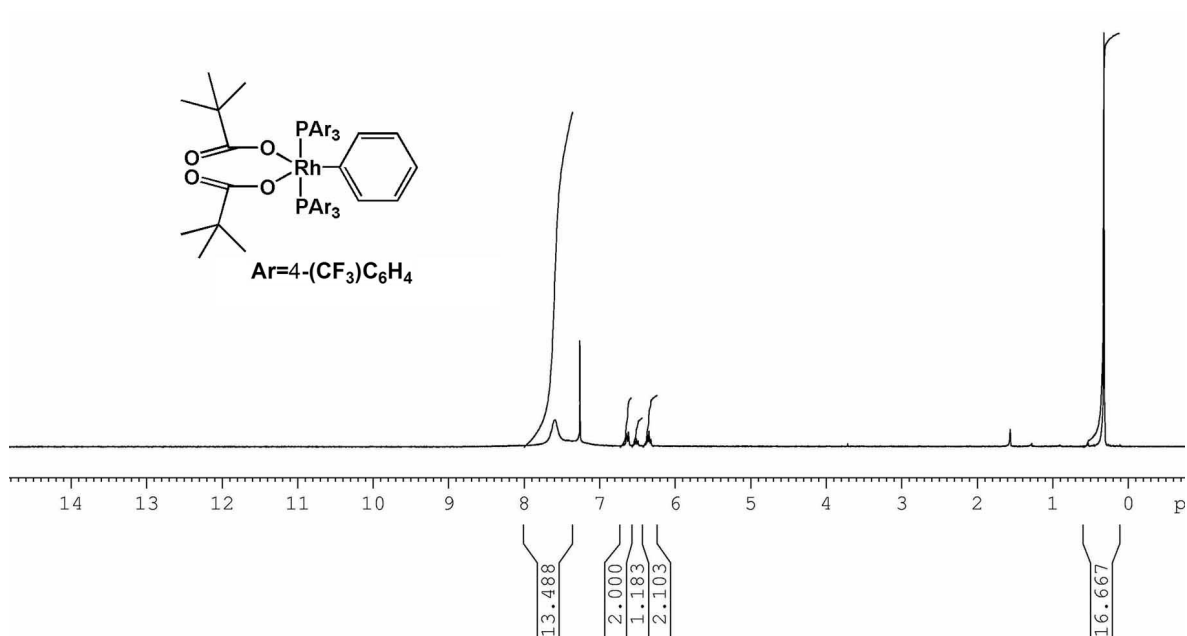

**Figure S1.** <sup>1</sup>H NMR (CDCl<sub>3</sub>) of Rh(OPiv)<sub>2</sub>{P[4-(CF<sub>3</sub>)C<sub>6</sub>H<sub>4</sub>]<sub>3</sub>}<sub>2</sub>Ph (**2**).

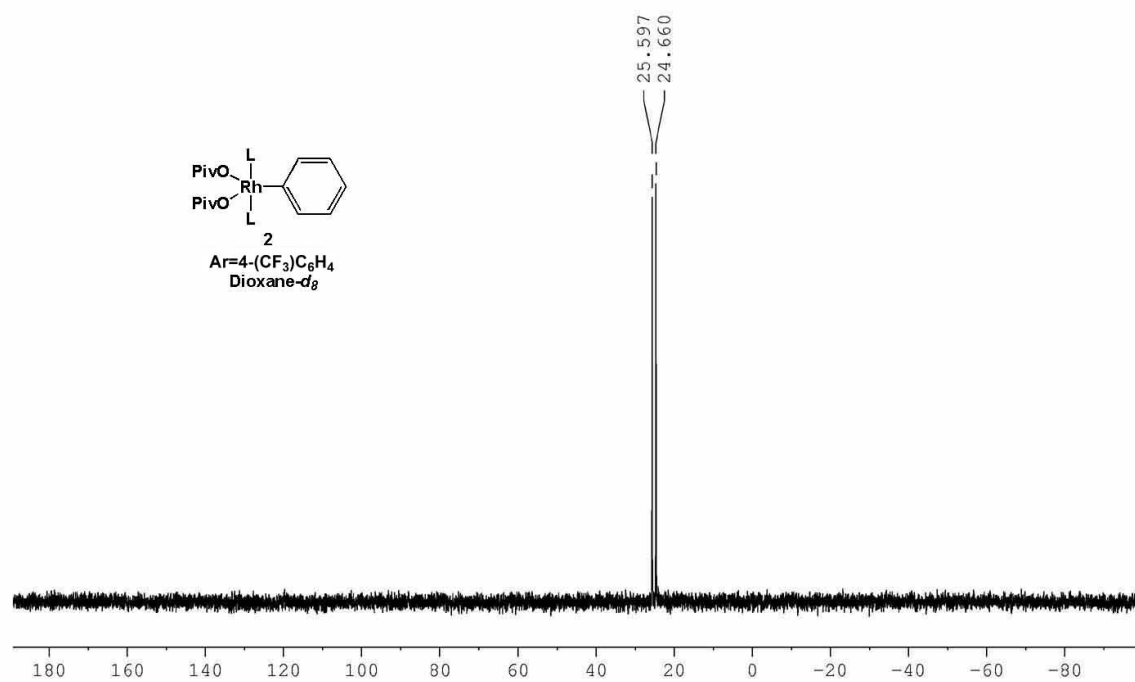

**Figure S2.** <sup>31</sup>P NMR of Rh(OPiv)<sub>2</sub>{P[4-(CF<sub>3</sub>)C<sub>6</sub>H<sub>4</sub>]<sub>3</sub>}<sub>2</sub>Ph (**2**) in dioxane-*d*<sub>8</sub>.

## NMR Monitoring of Catalytic Reaction

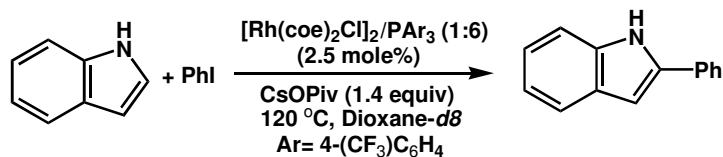

The above reaction ([Indole]=0.50 M, [PhI]=0.60 M, [1]=25 mM, [phos]<sub>total</sub>=150 mM) was carried out in an argon-filled J-Young NMR tube at 120°C in dioxane- $d_8$ . <sup>31</sup>P NMR was taken at room temperature.

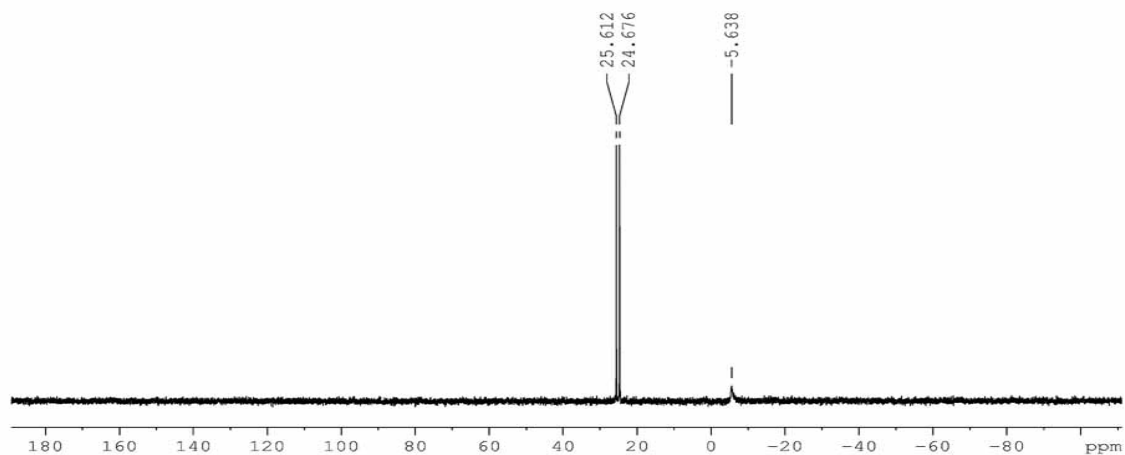

**Figure S3.** <sup>31</sup>P NMR of catalytic reaction mixture taken after 30 min of heating, dioxane- $d_8$ . Free phosphine L ( $\delta$  -5.64ppm)

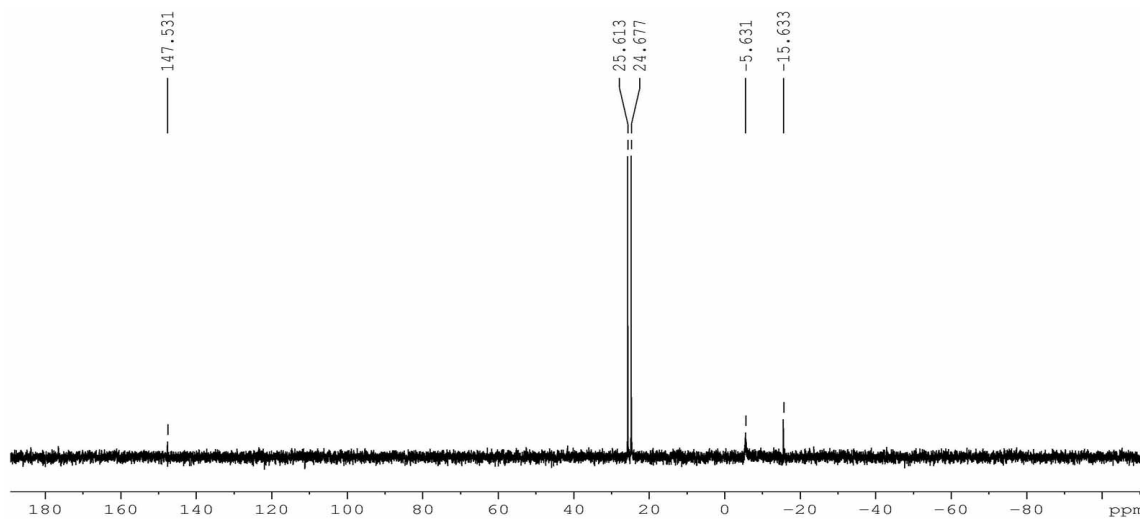

**Figure S4.** <sup>31</sup>P NMR of catalytic reaction mixture taken after 8h of heating in dioxane- $d_8$ .

Although the decomposition of phosphine is evident after prolonged heating, complex **2** remained as the only observable Rh-phosphine species (rhodium phosphine coupling).

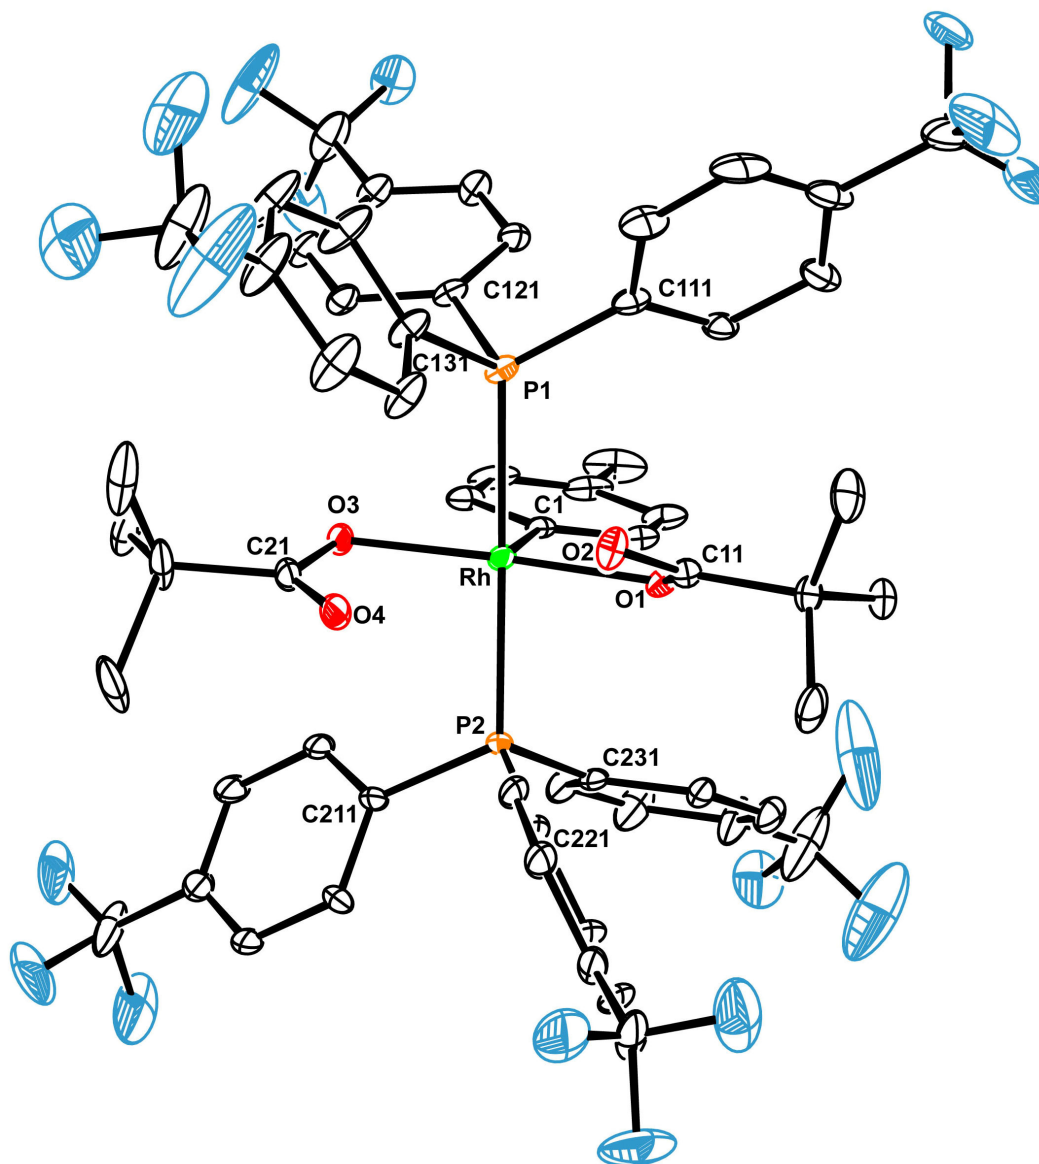

Ortep Drawing of **3**. A molecule of solvent and conformation isomers for fluoroines were omitted. For selected bond length and angles see table 2&3. For complete data see the CIF file.

Table 2. Selected Bond Lengths (Angstroms) for **3**

| Atom | A  | B   | Dist  | A  | B  | Dist  |
|------|----|-----|-------|----|----|-------|
|      | O1 | C11 | 1.298 | P2 | Rh | 2.346 |
|      | O1 | Rh  | 2.034 | Rh | C1 | 1.989 |
|      | O2 | C11 | 1.226 | Rh | O1 | 2.034 |
|      | O3 | C21 | 1.288 | Rh | O3 | 2.055 |
|      | O3 | Rh  | 2.055 | Rh | P2 | 2.346 |
|      | O4 | C21 | 1.218 | Rh | P1 | 2.357 |
|      | P1 | Rh  | 2.357 |    |    |       |

Table 3. Selected Bond Angles for **3**

| Atom | A    | B   | C    | Angle  | A    | B  | C    | Angle  |
|------|------|-----|------|--------|------|----|------|--------|
|      | C2   | C1  | Rh   | 122.61 | C231 | P2 | C221 | 104.46 |
|      | C6   | C1  | Rh   | 120.73 | C231 | P2 | C211 | 103.88 |
|      | O2   | C11 | O1   | 120.24 | C231 | P2 | Rh   | 112.85 |
|      | O2   | C11 | C12  | 123.02 | C221 | P2 | C211 | 104.81 |
|      | O1   | C11 | C12  | 116.74 | C221 | P2 | Rh   | 112.67 |
|      | O4   | C21 | O3   | 121.9  | C211 | P2 | Rh   | 116.96 |
|      | O4   | C21 | C22  | 121.58 | C1   | Rh | O1   | 89.31  |
|      | O3   | C21 | C22  | 116.48 | C1   | Rh | O3   | 92.81  |
|      | C11  | O1  | Rh   | 111.83 | C1   | Rh | P2   | 91.89  |
|      | C21  | O3  | Rh   | 105.5  | C1   | Rh | P1   | 90.58  |
|      | C111 | P1  | C121 | 103.53 | O1   | Rh | O3   | 177.25 |
|      | C111 | P1  | C131 | 103.49 | O1   | Rh | P2   | 84.39  |
|      | C111 | P1  | Rh   | 119    | O1   | Rh | P1   | 95.72  |
|      | C121 | P1  | C131 | 103.42 | O3   | Rh | P2   | 93.79  |
|      | C121 | P1  | Rh   | 112.77 | O3   | Rh | P1   | 86.01  |
|      | C131 | P1  | Rh   | 112.98 | P2   | Rh | P1   | 177.53 |

## Kinetics of Stoichiometric Reactions.

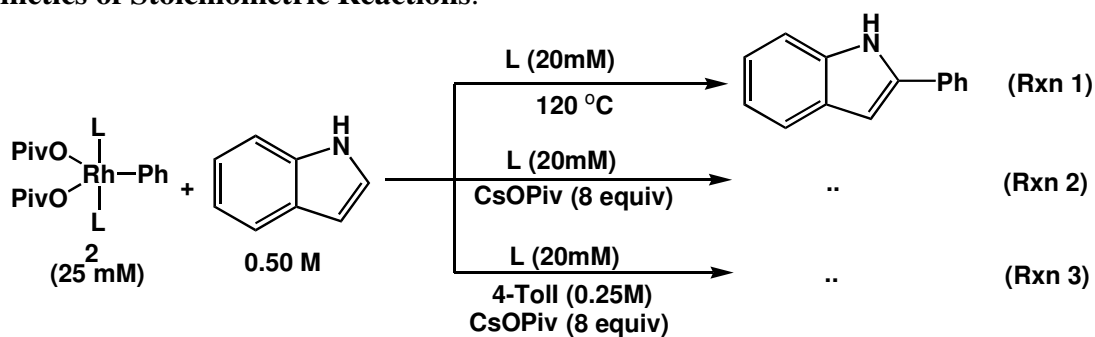

A stock solution (**Stock A**) was prepared by mixing the following solutions: **L** (1.0 mL, 1.0 M in 1,4-dioxane), indole (16.0 mL, 1.25 M in 1,4-dioxane) and dodecane (1.60 mL, 72.5 mg/ mL) and then was diluted by dioxane to a total volume of 20.0 mL.

For reaction 1: A reaction vial was charged with **2** (16.4 mg, 12.5 μmol), **stock A** (250 μL) and dioxane (250 μL). The vial was capped with a Teflon septum-equipped cap, heated at 120 °C for 3 minutes and the reaction was then monitored by GC-MS.

For reaction 2: A reaction vial was charged with **2** (16.4 mg, 12.5 μmol), **stock A** (250 μL), CsOPiv (23 mg, 0.10 mmol) and dioxane (250 μL). The vial was capped with a Teflon septum-equipped cap, heated at 120 °C for 3 minutes and the reaction was then monitored by GC-MS.

For reaction 3: A reaction vial was charged with **2** (16.4 mg, 12.5 μmol), **stock A** (250 μL), 4-TolI (100 μL, 1.25 M) and dioxane (150 μL). The vial was capped with a Teflon septum-equipped cap, heated at 120 °C for 3 minutes and the reaction was then monitored by GC-MS. Each of the above experiments was performed twice (**Figure S5**).

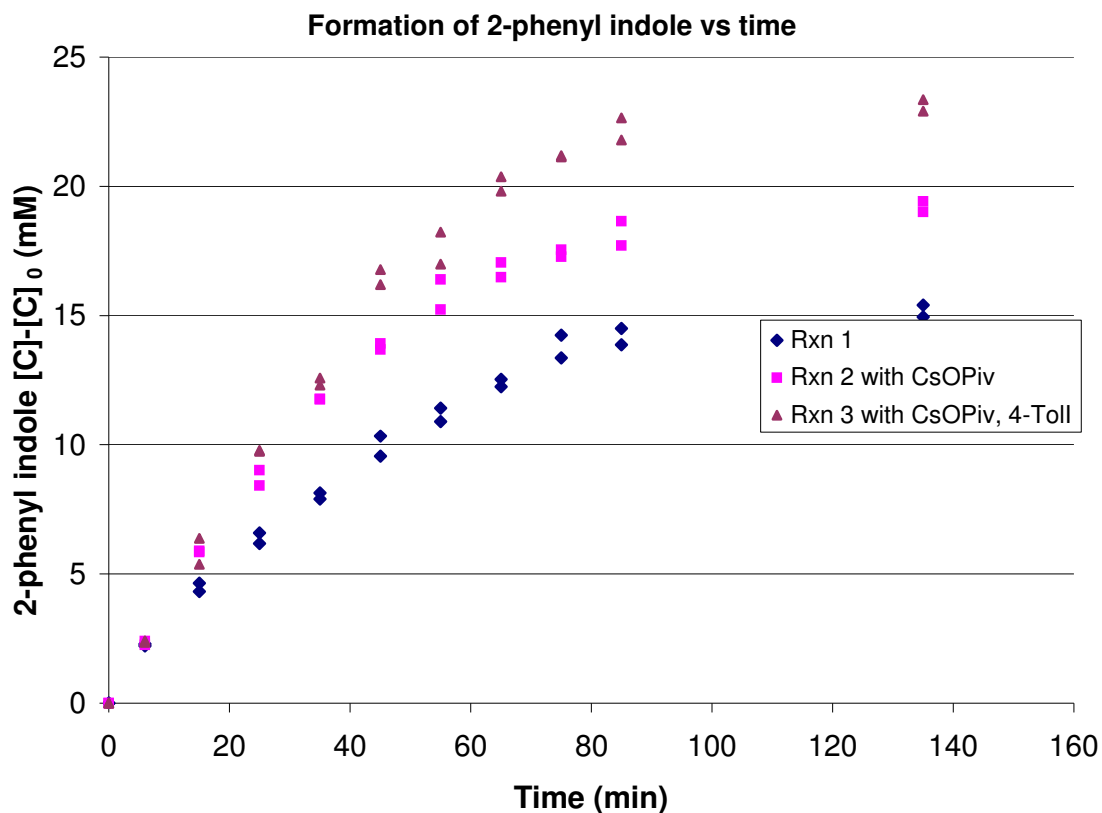

**Figure S5.** Stoichiometric Reaction of **2** and Indole.

Initial conditions:

Rxn 1: [2]=25 mM, [indole]=0.5 M, [L] = 25 mM.<sup>1</sup>

Rxn 2: [2]=25 mM, [indole]=0.5 M, [L] = 25 mM, CsOPiv (heterogeneous, 8 equiv)

Rxn 3: [2]=25 mM, [indole]=0.5 M, [L] = 25 mM, CsOPiv (heterogeneous, 8 equiv), [4-Toll]= 0.25M.<sup>2</sup>

Initial rate for the formation of 2-phenyl indole(first 300 seconds)

**Rxn 1=0.375(7) mM\*min<sup>-1</sup>.**

**Rxn 2=0.387(9) mM\*min<sup>-1</sup>**

**Rxn 3=0.397(5) mM\*min<sup>-1</sup>**

<sup>1</sup> 1 equivalence of phosphine **L** was added to maintain the concentration of free phosphine.

<sup>2</sup> Formation of 2-(4-Tolyl) indole was also observed after 30 minutes via the generation of complex **3**.

### Determination of Reaction Order Based on Initial Rate Dependence on Reagent Concentration:<sup>3</sup>

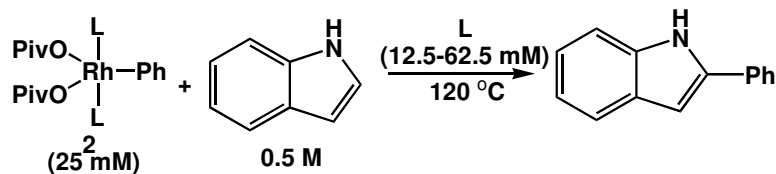

#### Rate dependence on phosphine [L] (12.5-65.2 mM):

**Stock solution B** was prepared as following: Indole (2.40 mL, 1.25 M in dioxane), dodecane (240  $\mu\text{L}$ , 72.5 mg/ mL) and dioxane (diluted to a total amount of 3.0 mL)

Five different amounts of **L** (25.0  $\mu\text{L}$ , 33.5  $\mu\text{L}$ , 50.0  $\mu\text{L}$ , 61.5  $\mu\text{L}$ , 135.5  $\mu\text{L}$ , 0.50 M in dioxane), **2** (16.4 mg, 12.5  $\mu\text{mol}$ ), stock B (250  $\mu\text{L}$ ) and five different amounts of dioxane (225  $\mu\text{L}$ , 216  $\mu\text{L}$ , 200  $\mu\text{L}$ , 188  $\mu\text{L}$ , 114  $\mu\text{L}$ ) were charged into 5 reaction vials, respectively. Vials were capped and heated at 120  $^\circ\text{C}$ . Monitoring starts after 3 min of preheating and initial rates recorded for first 300 seconds (5 minutes, conversion <10%). Experiments were repeated once. Data are plotted in **Figure S6**.

|                                                  |       |       |       |       |       |
|--------------------------------------------------|-------|-------|-------|-------|-------|
| [L] (mM)                                         | 12.5  | 16.7  | 25    | 30.7  | 65.2  |
| 1/[L] ( $\text{mM}^{-1}$ )                       | 80.0  | 59.9  | 40.0  | 32.6  | 15.3  |
| Initial rate ( $\text{mM}\cdot\text{min}^{-1}$ ) | 0.803 | 0.658 | 0.398 | 0.324 | 0.149 |
| Initial rate ( $\text{mM}\cdot\text{min}^{-1}$ ) | 0.825 | 0.607 | 0.367 | 0.358 | 0.133 |

Conditions: [indole] = 0.50 M, [**2**] = 25 mM, [L] (12.5-65.2 mM) .

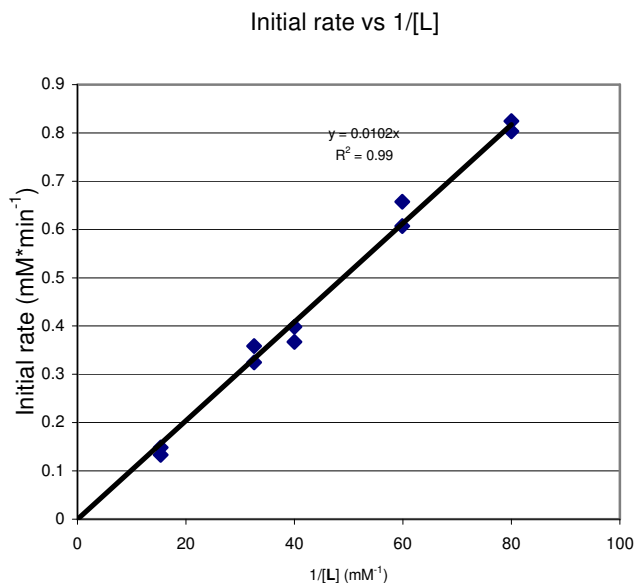

**Figure S6.** Initial Rates-Inversed-first order plot on phosphine [L]

<sup>3</sup> Due to the decomposition of **2** in the absence of CsOPiv and PhI (trapping effect), reaction order for the stoichiometric reaction of **2** and indole was determined using initial rate kinetics.

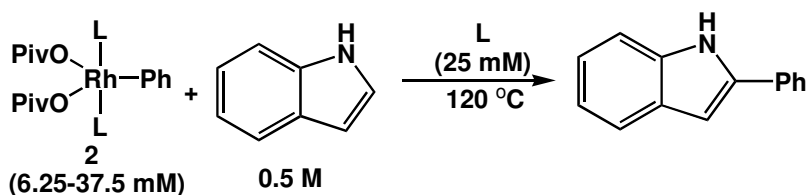

**Rate dependence on [2] (6.25-37.5mM):**

**Stock solution C:** Indole (2.4 mL, 1.25 M in dioxane), dodecane (240  $\mu\text{L}$ , 72.5 mg/mL), **L** (150.0  $\mu\text{L}$ , 1.0 M in dioxane) and dioxane (diluted to a total amount of 3.0 mL).

Five different amount of **2** (4.1 mg, 8.2 mg, 16.4 mg, 20.5 mg, 24.6 mg), stock C (250  $\mu\text{L}$ ) and dioxane (250  $\mu\text{L}$ ) were charged into five reaction vials, respectively. Vials were capped and heated at 120  $^\circ\text{C}$ . Monitoring starts after 3 min of preheating and initial rates recorded for first 300 seconds (5 minutes, conversion <10%). Experiments were repeated once. Data are plotted in **Figure S7**.

| [2] (mM)                             | 6.25  | 12.5  | 25    | 31.25 | 37.5  |
|--------------------------------------|-------|-------|-------|-------|-------|
| Initial rate (mM*min <sup>-1</sup> ) | 0.064 | 0.178 | 0.373 | 0.451 | 0.559 |
| Initial rate (mM*min <sup>-1</sup> ) | 0.070 | 0.169 | 0.385 | 0.432 | 0.517 |

Conditions: [indole] = 0.50 M, [L] = 25 mM.

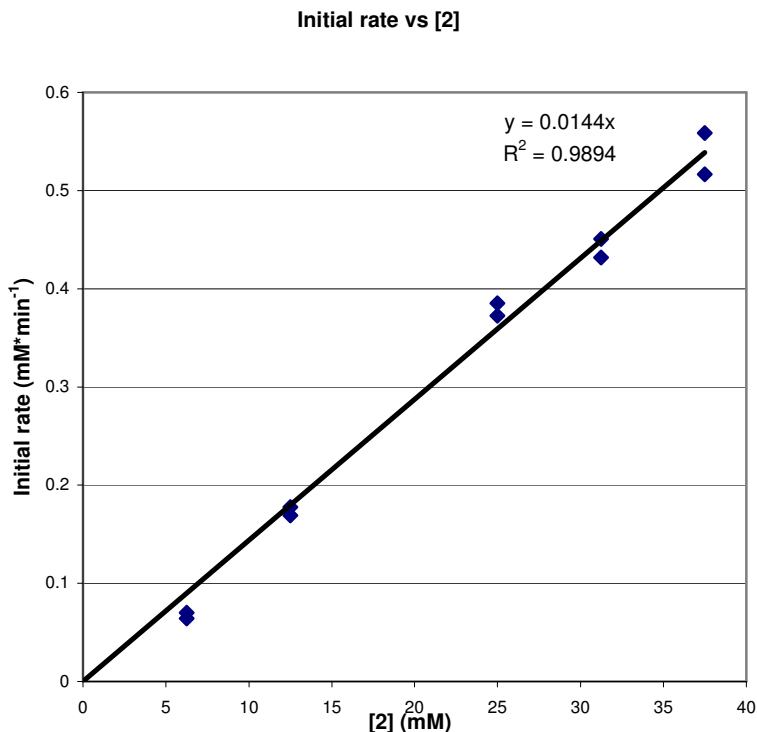

**Figure S7.** First order plot on [2]

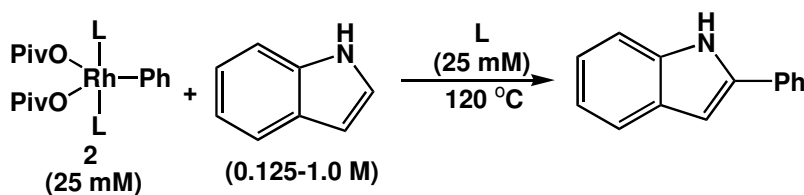

**Rate dependence on [indole] (0.125-1.0 M):**

**Stock solution D:** L (75.0  $\mu\text{L}$ , 1.0 M in dioxane), dodecane (120  $\mu\text{L}$ , 72.5 mg/ mL) and dioxane (diluted to a total amount of 3.00 mL).

Five different amounts of indole (50.0  $\mu\text{L}$ , 100  $\mu\text{L}$ , 200  $\mu\text{L}$ , 300  $\mu\text{L}$ , 400  $\mu\text{L}$ , 1.25 M in dioxane), **2** (16.4 mg, 12.5  $\mu\text{mol}$ ), stock D (50  $\mu\text{L}$ ) and five different amounts of dioxane (400  $\mu\text{L}$ , 350  $\mu\text{L}$ , 250  $\mu\text{L}$ , 150  $\mu\text{L}$ , 50  $\mu\text{L}$ ) were charged into 5 reaction vials, separately. Vials were capped and heated at 120  $^{\circ}\text{C}$ . Monitoring starts after 3 min of preheating and initial rates recorded for first 300 seconds (5 minutes, conversion <10%). Experiments were repeated once. Data are plotted in **Figure S8**.

| [Indole] (M)                                     | 0.125 | 0.25  | 0.5   | 0.75  | 1.0   |
|--------------------------------------------------|-------|-------|-------|-------|-------|
| Initial rate ( $\text{mM}\cdot\text{min}^{-1}$ ) | 0.117 | 0.233 | 0.362 | 0.567 | 0.719 |
| Initial rate ( $\text{mM}\cdot\text{min}^{-1}$ ) | 0.120 | 0.195 | 0.394 | 0.588 | 0.755 |

Conditions: [**2**] = 25.0 mM, [L] = 25.0 mM.

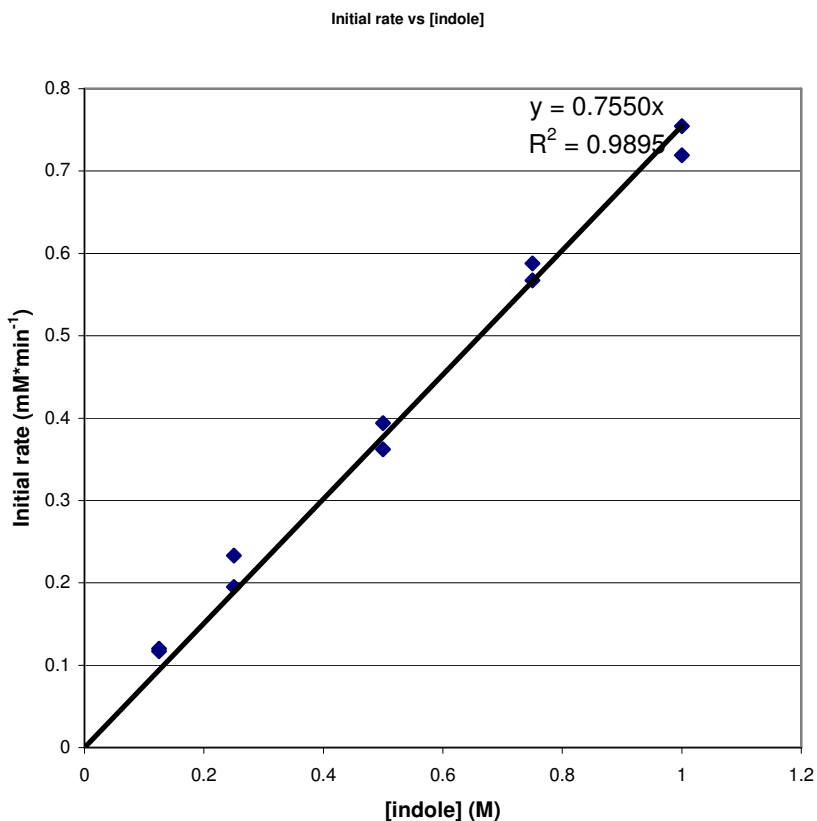

**Figure S8.** First Order Plot on [Indole].

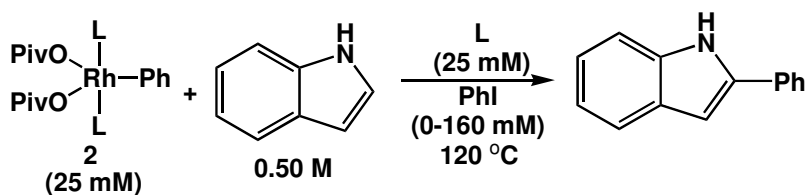

### Rate dependence on [PhI] (0-160mM):

Five different amounts of PhI (0  $\mu\text{L}$ , 20  $\mu\text{L}$ , 40  $\mu\text{L}$ , 80  $\mu\text{L}$ , 160  $\mu\text{L}$ , 1.0 M in dioxane), **2** (16.4 mg, 12.5  $\mu\text{mol}$ ), stock A (250  $\mu\text{L}$ ) and five different amounts of dioxane (250  $\mu\text{L}$ , 230  $\mu\text{L}$ , 210  $\mu\text{L}$ , 170  $\mu\text{L}$ , 90  $\mu\text{L}$ ) were charged into 5 reaction vials, separately. Vials were capped and heated at 120  $^\circ\text{C}$ . Monitoring starts after 3 min of preheating and initial rates recorded for first 300 seconds (5 minutes, conversion <10%). Experiments were performed once due to apparent zero order dependence on [PhI]. Data plotted in **Figure S9**.

| [PhI] (mM)                                | 0     | 20    | 40    | 80    | 160   |
|-------------------------------------------|-------|-------|-------|-------|-------|
| Initial rate (mM $\cdot\text{min}^{-1}$ ) | 0.380 | 0.414 | 0.399 | 0.382 | 0.386 |

Conditions: [indole] = 0.50 M, [**2**] = 25.0 mM, [L] = 25.0 mM.

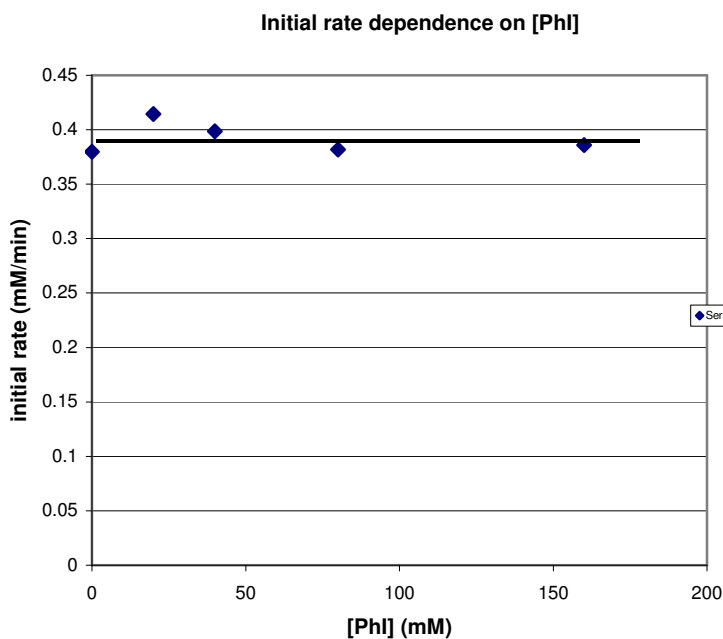

**Figure S9.** Zero order Plot on [PhI]

## Kinetics of Catalytic Reactions<sup>4</sup>

Measurement of H/D kinetic isotope effect: In an argon filled glovebox, **1** (9.0 mg, 0.0125 mmol), P[4-(CF<sub>3</sub>)C<sub>6</sub>H<sub>4</sub>]<sub>3</sub> (**L**, 36.0 mg, 0.075 mmol), indole (58.5 mg, 0.50 mmol), benzophenone (internal standard, 29 mg), CsOPiv (164 mg, 0.70 mmol) and PhI (122 mg, 0.60 mmol) was charged into a vial, followed by the addition of 1,4-dioxane (1.0 mL). Similarly, reaction mixture were loaded into three other vials with 1-indole-*d*<sub>1</sub> (59.0 mg, 0.50 mmol), 2-indole-*d*<sub>1</sub> (59.0 mg, 0.50 mmol) and 3-indole-*d*<sub>1</sub> (59.0 mg, 0.50 mmol), respectively. The vials were capped, brought out the glovebox, and heated at 120 °C in a reaction block. After 5 minutes of preheating, reaction samples were taken periodically via syringe and their component concentration was analyzed via a GC/FID. H/D scrambling of indole was checked via GC/MS detector separately. Data are plotted in **Figure S10**. Initial rates are plotted in **Figure S11**.

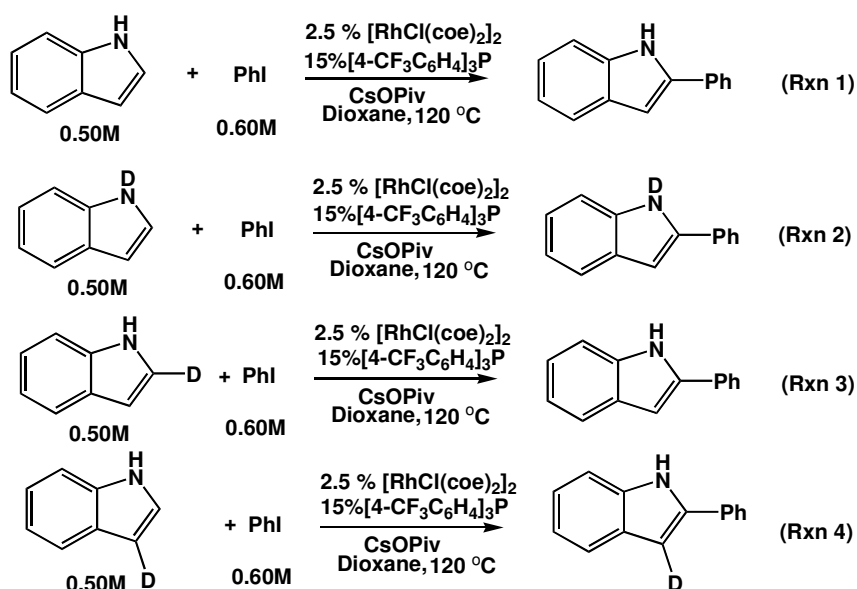

<sup>4</sup> Due to the gradual decomposition of phosphine (erosion) during reaction process, direct measurements of  $k_{\text{H}}$  and  $k_{\text{D}}$  from individual reactions were not feasible. Initial rate kinetics were applied instead.

# Reaction of Isotope-Incorporated Indole with PhI at Initial Stage

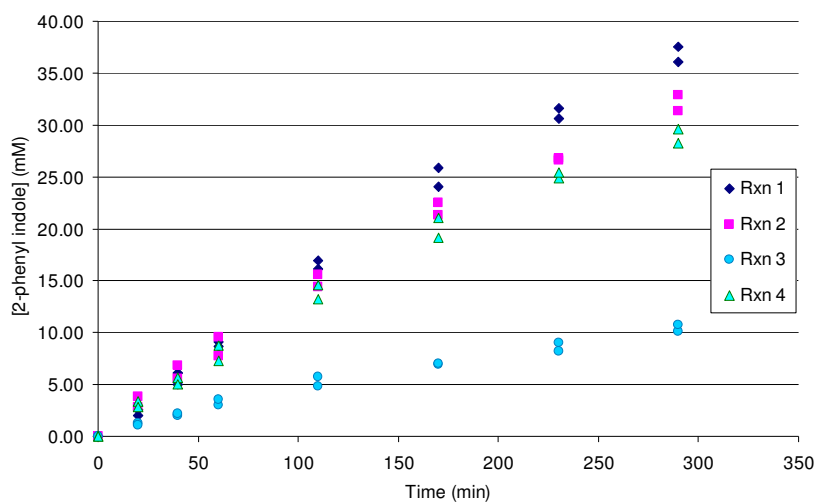

**Figure S10.** Initial conditions: [1] = 12.5  $\mu$ M, [L] = 37.5  $\mu$ M, [Indole] = 0.50 M, [PhI] = 0.60 M.

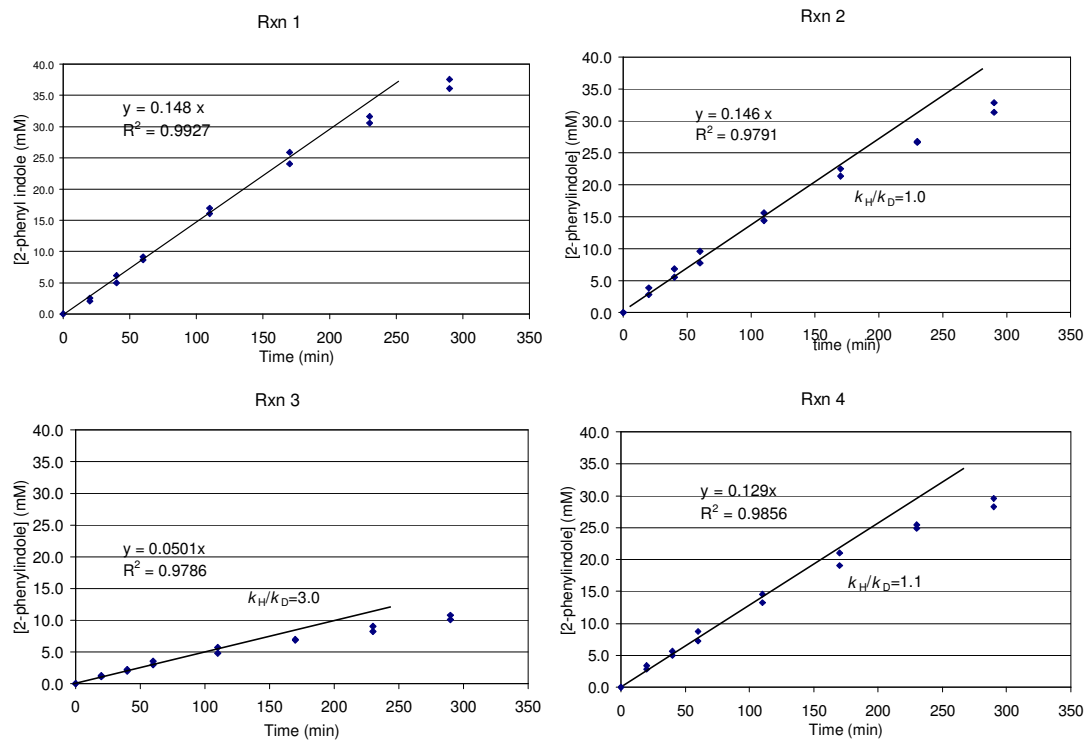

**Figure S11**

D/H scrambling was monitored by GC/MS separately. 1-indole- $d_1$  lost ~20% deuterium after 200 min, 2-indole- $d_1$  lost <5% deuterium after 200 min, 3-indole- $d_1$  lost ~30% deuterium in 200 minutes. Partial loss of deuterium from 1-indole- $d_1$  and 3-indole- $d_1$  does not cause significant deviation in KIE measurement, as KIE at both positions are close to 1 ( $k_D \approx k_H$ ).

SW-I-129  
MSO wb30

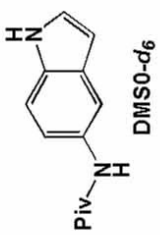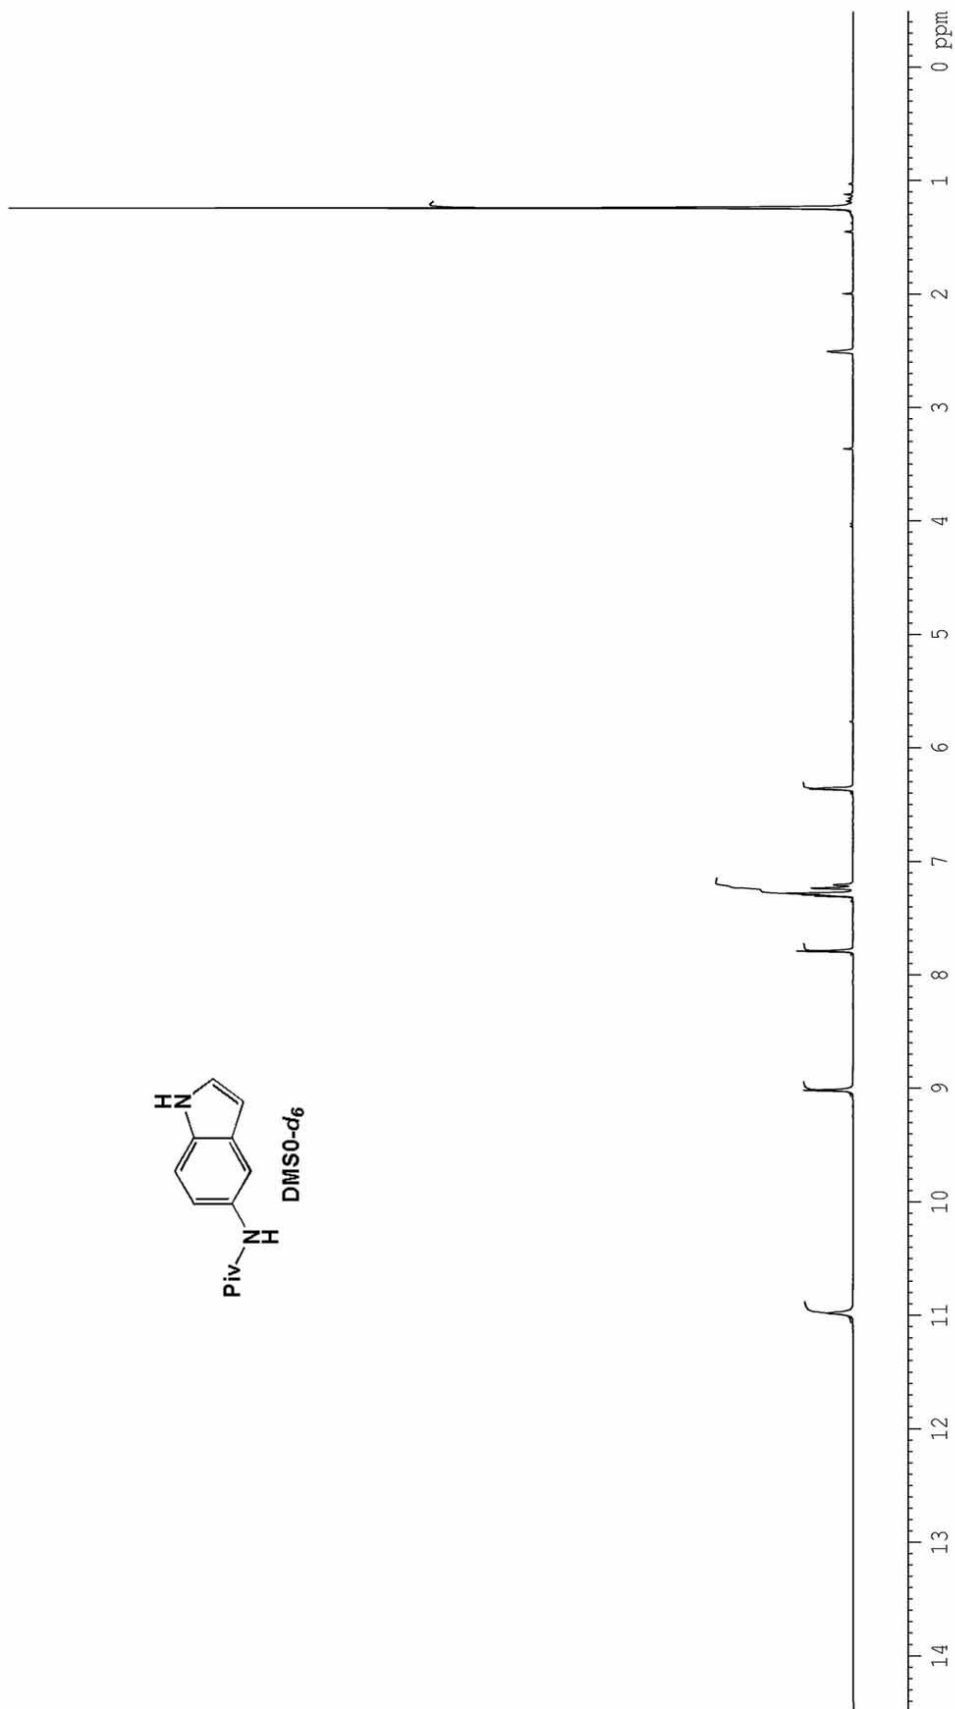

proton standard  
SW-I-194

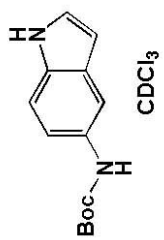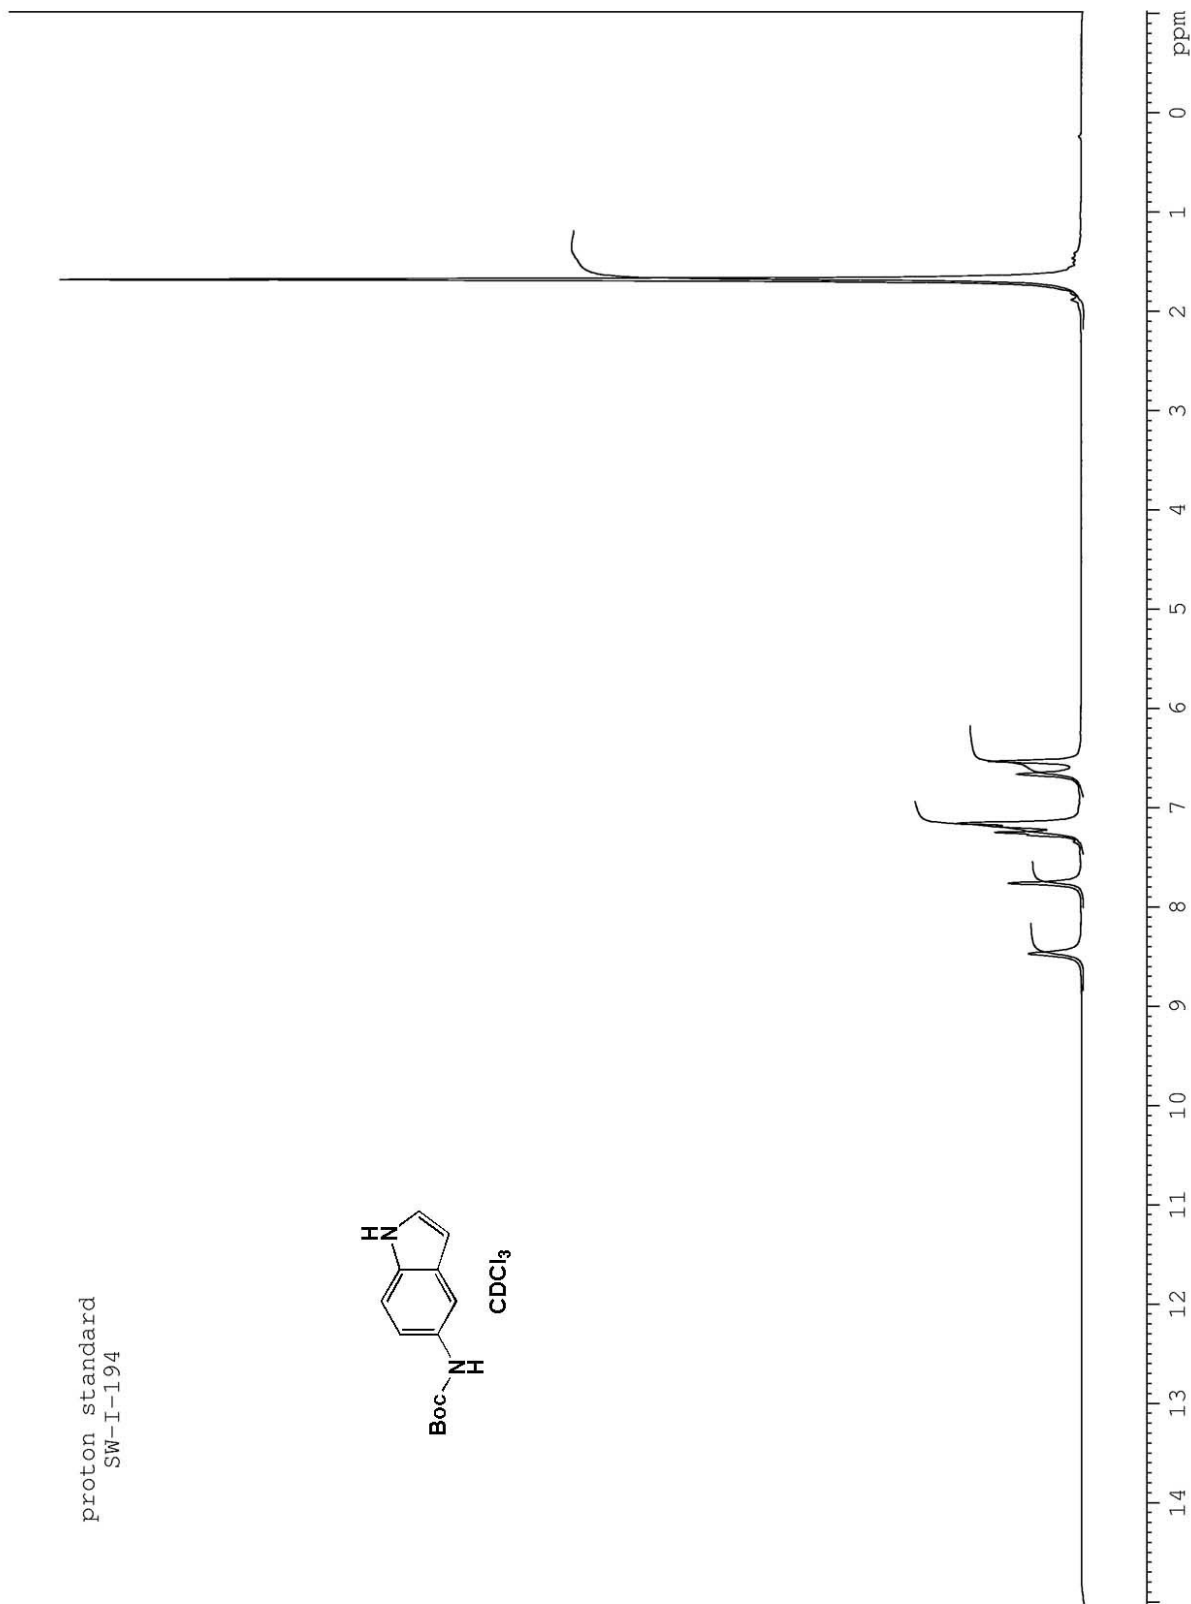

SW-I-141-2  
proton standard

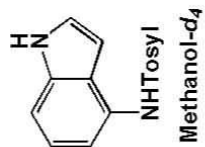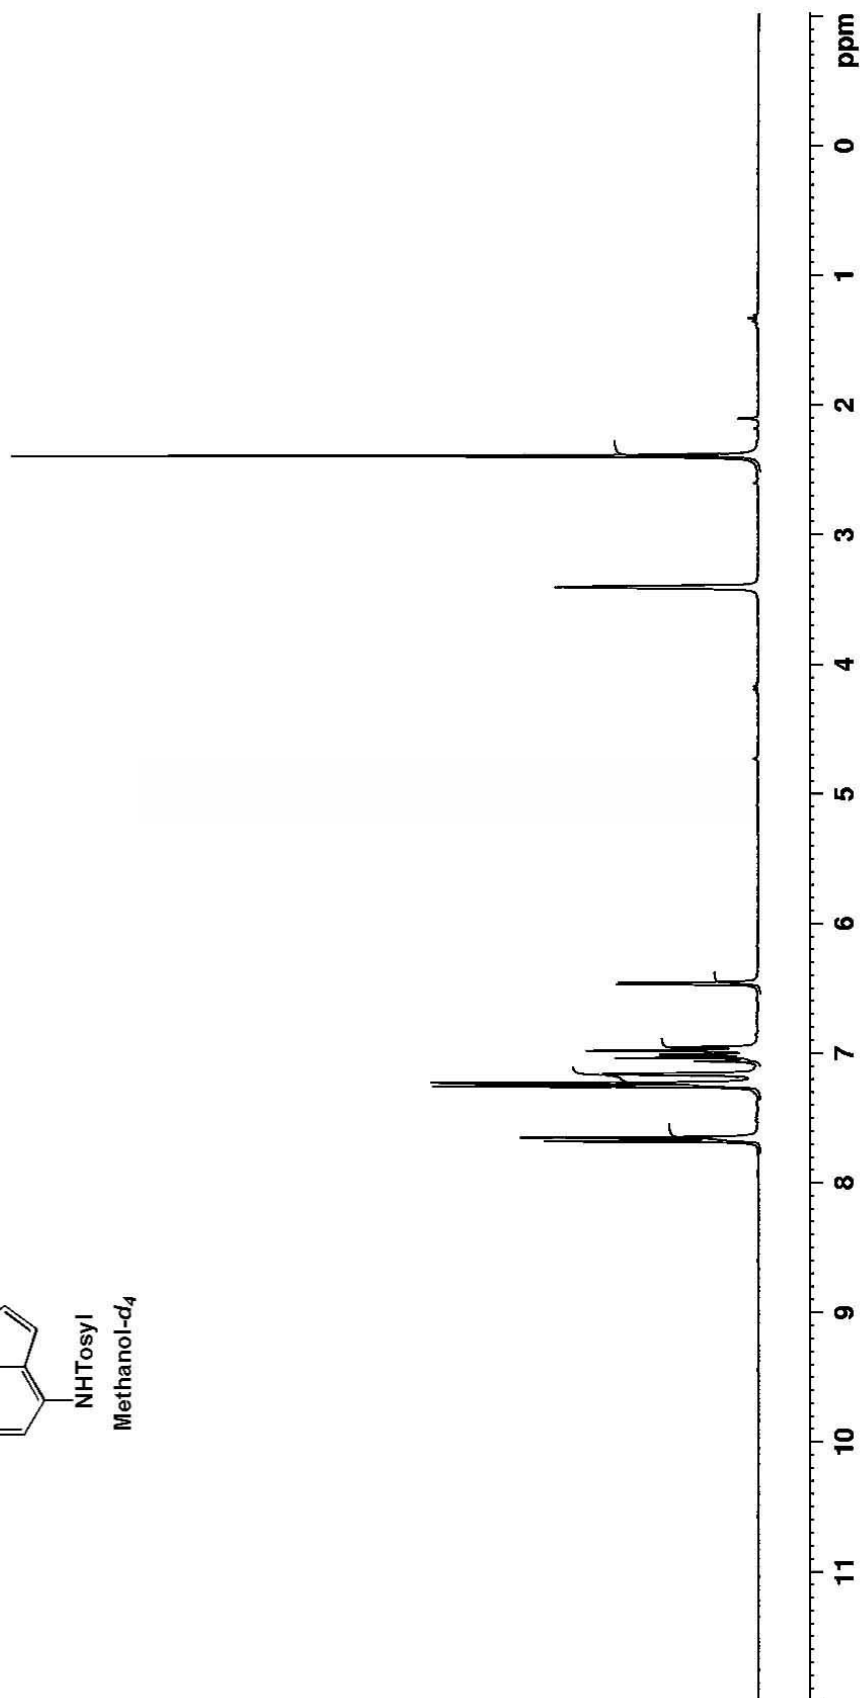

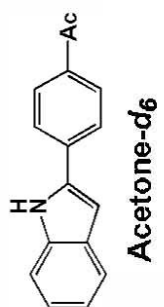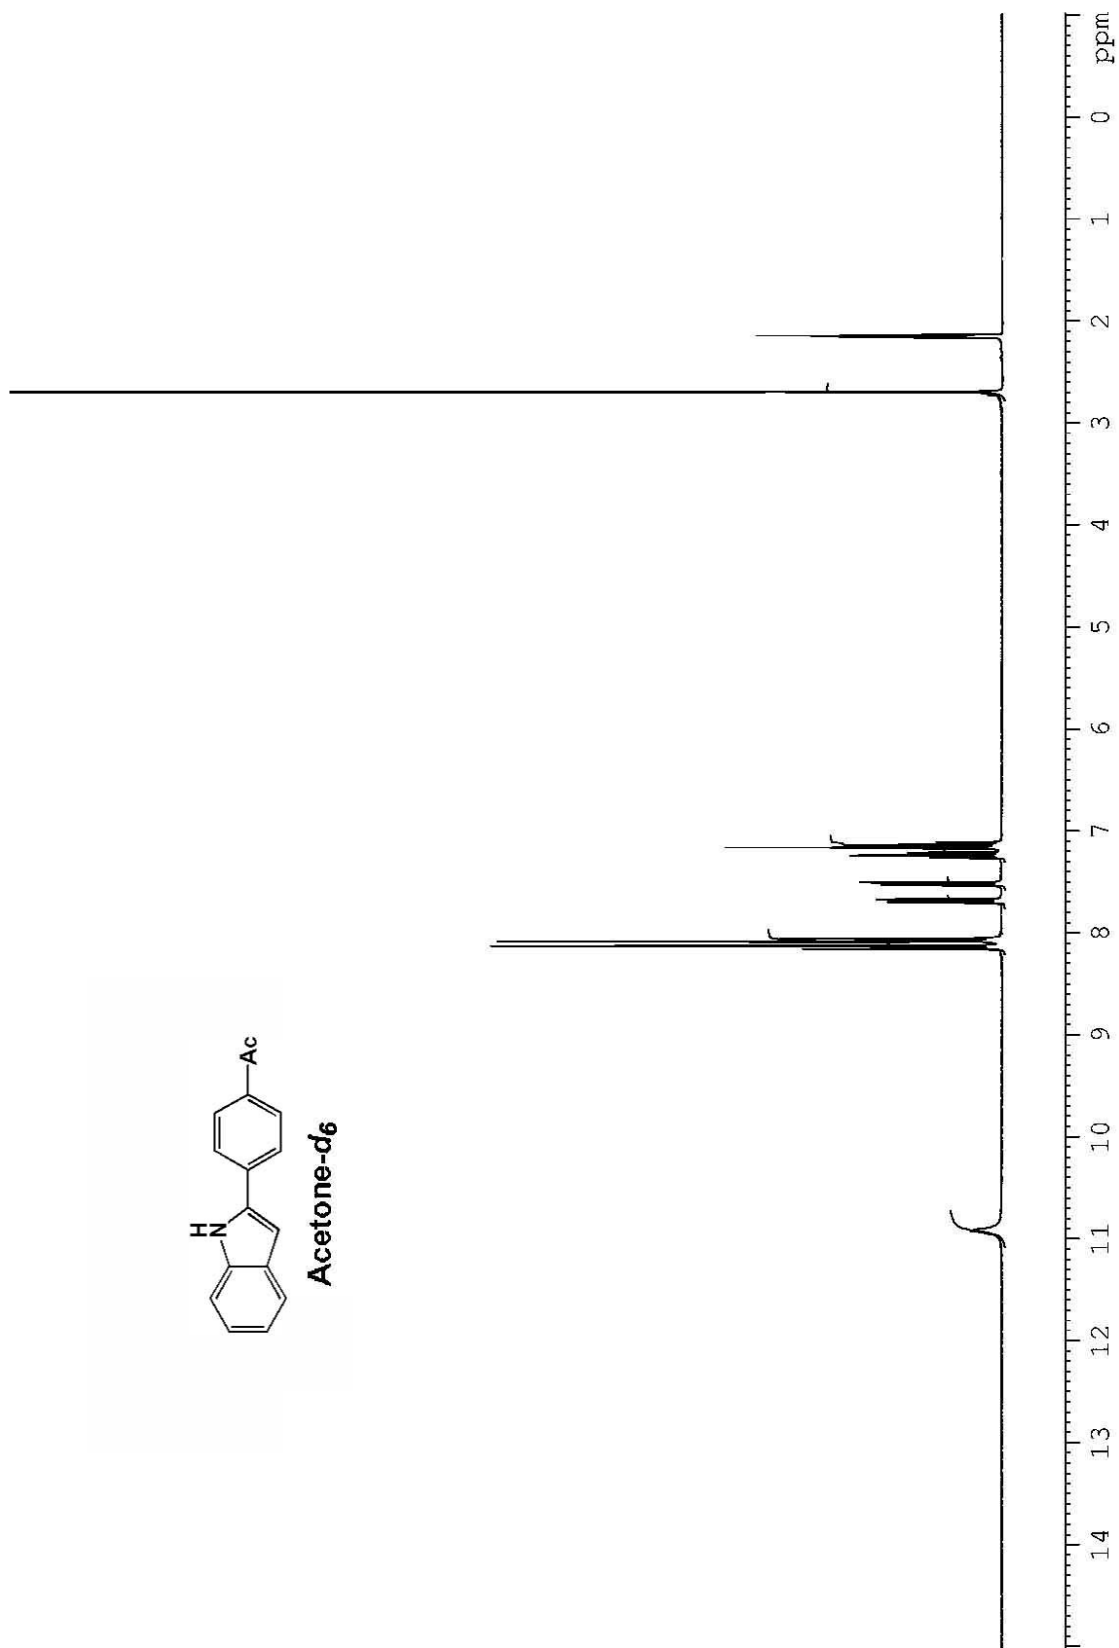

SW-I-175  
proton  
DMSO

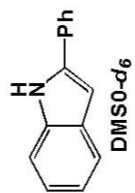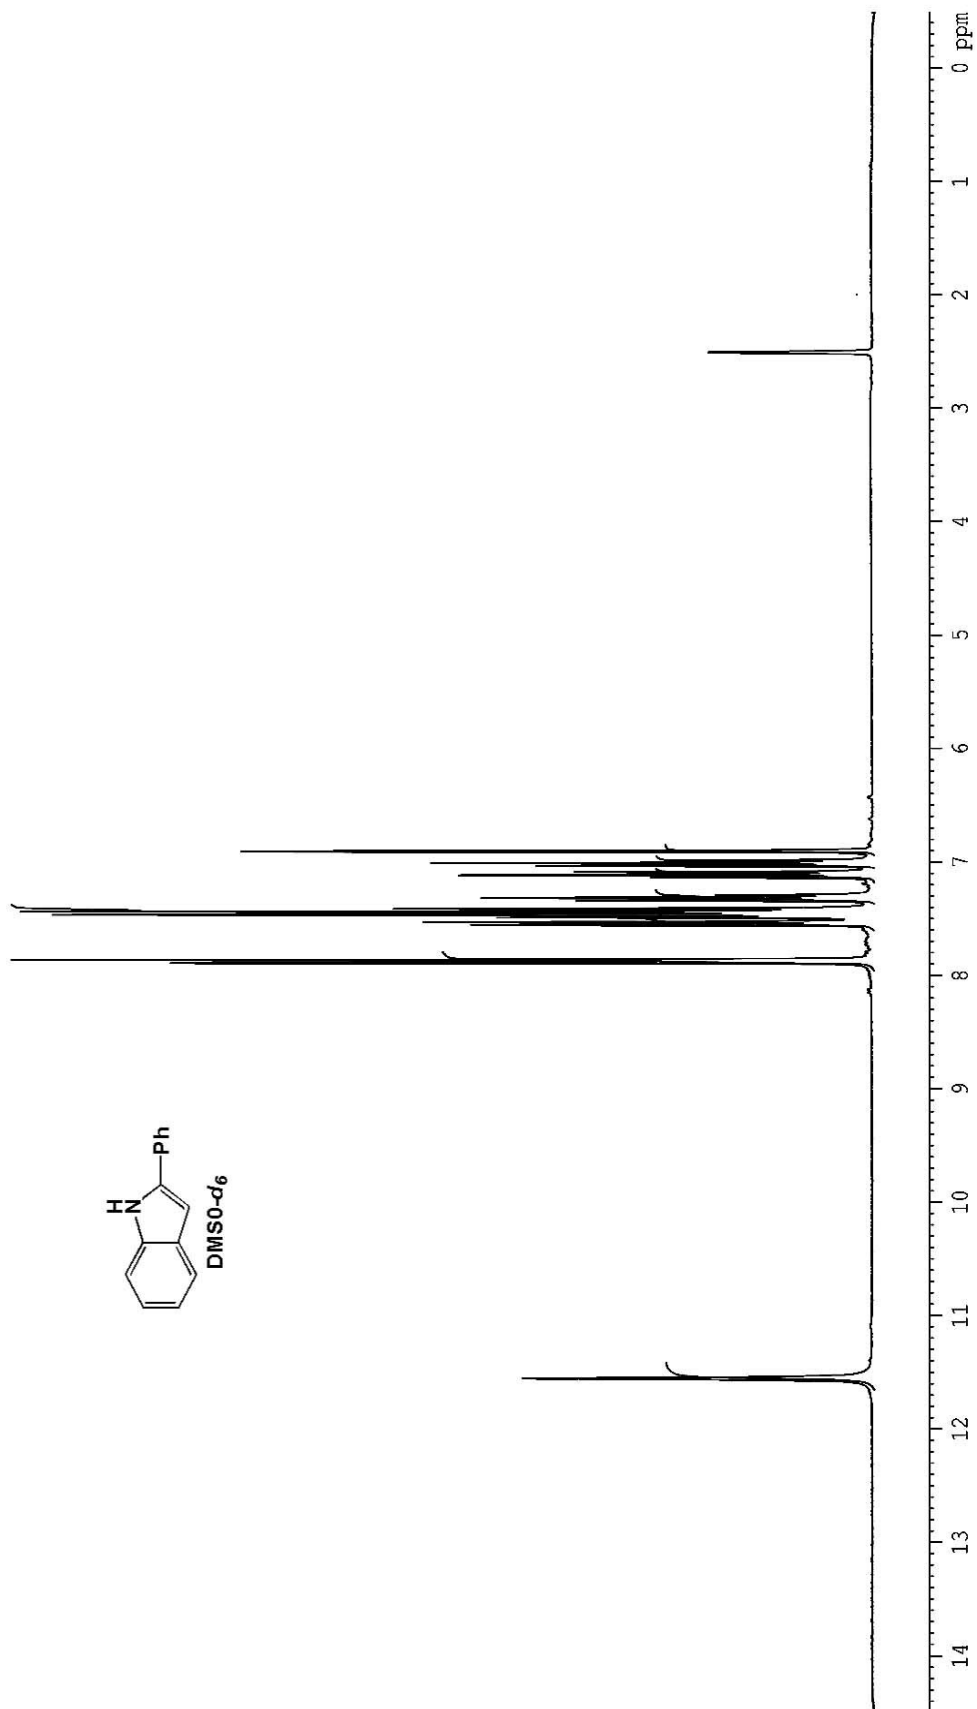

SW-I-210 wb300/DMSO  
proton

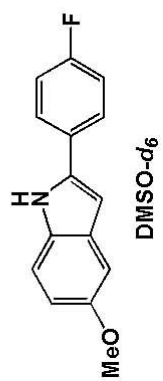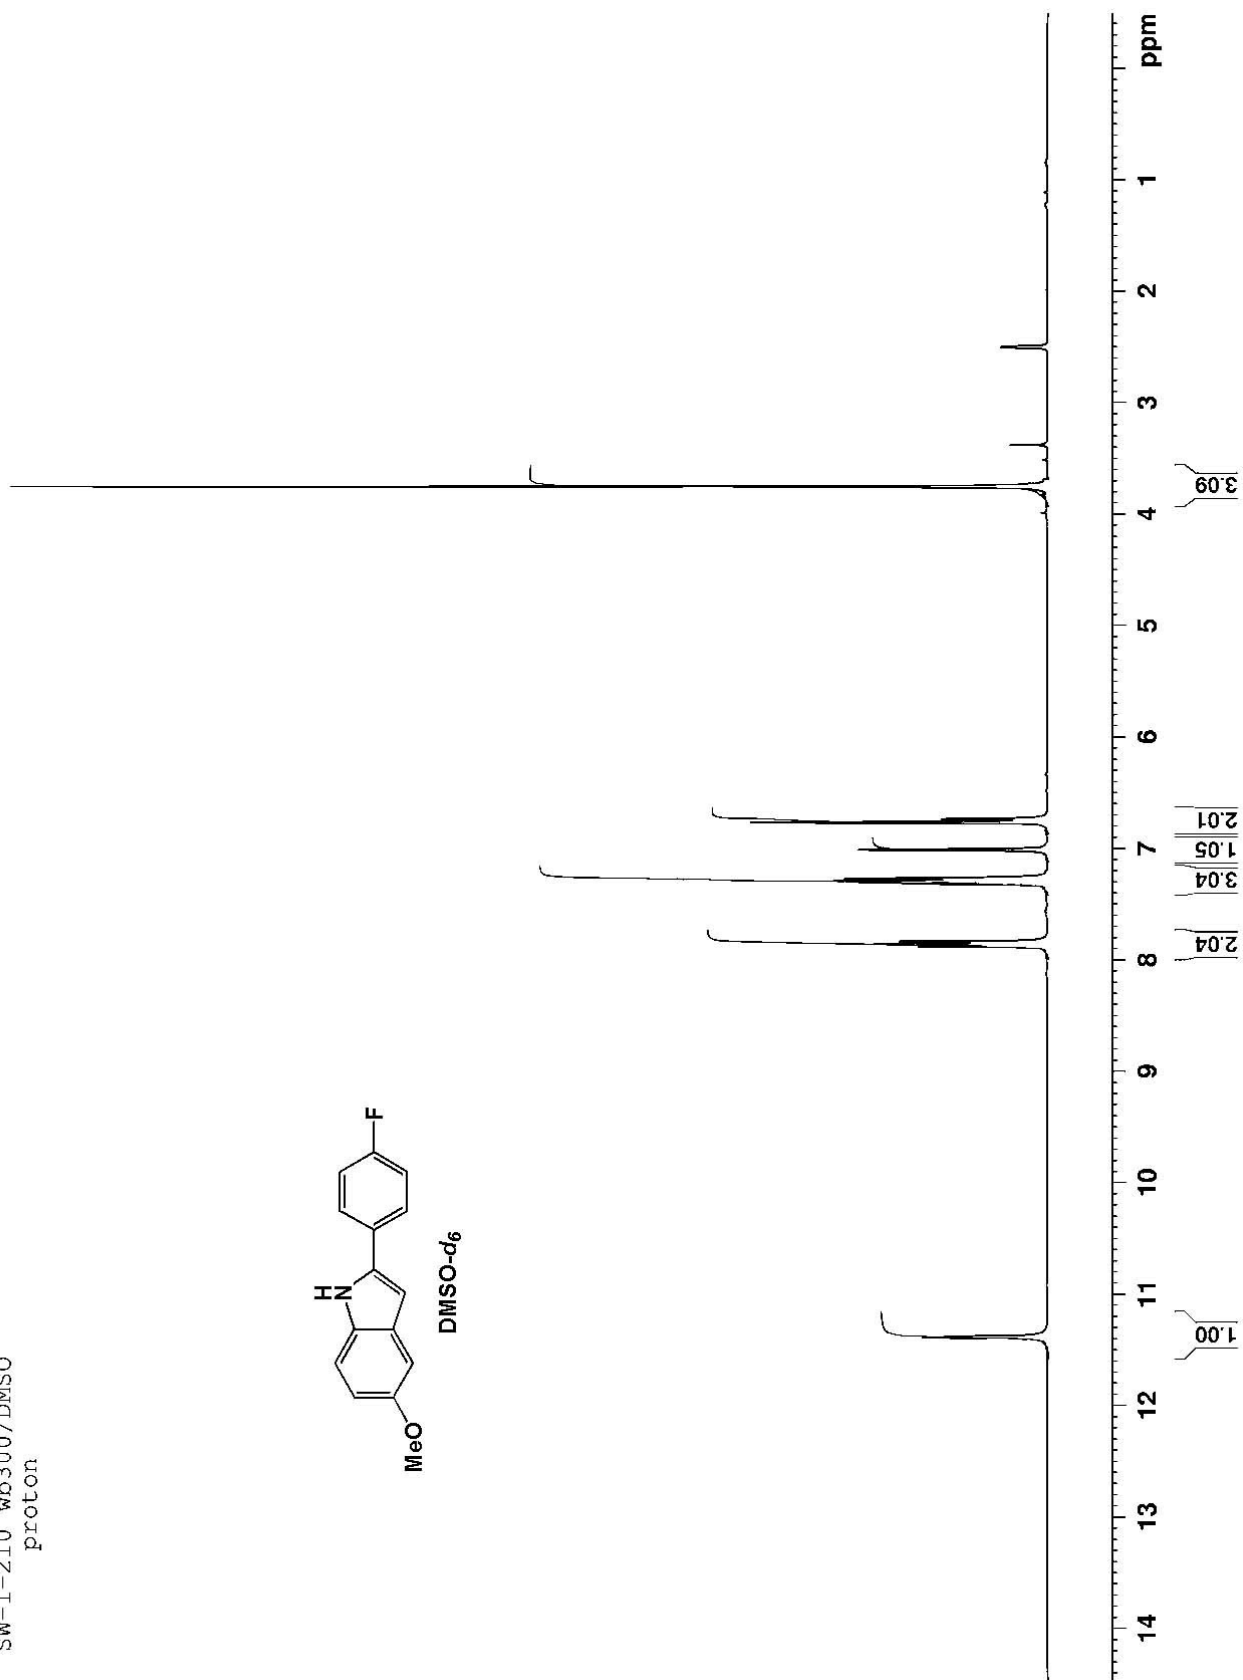

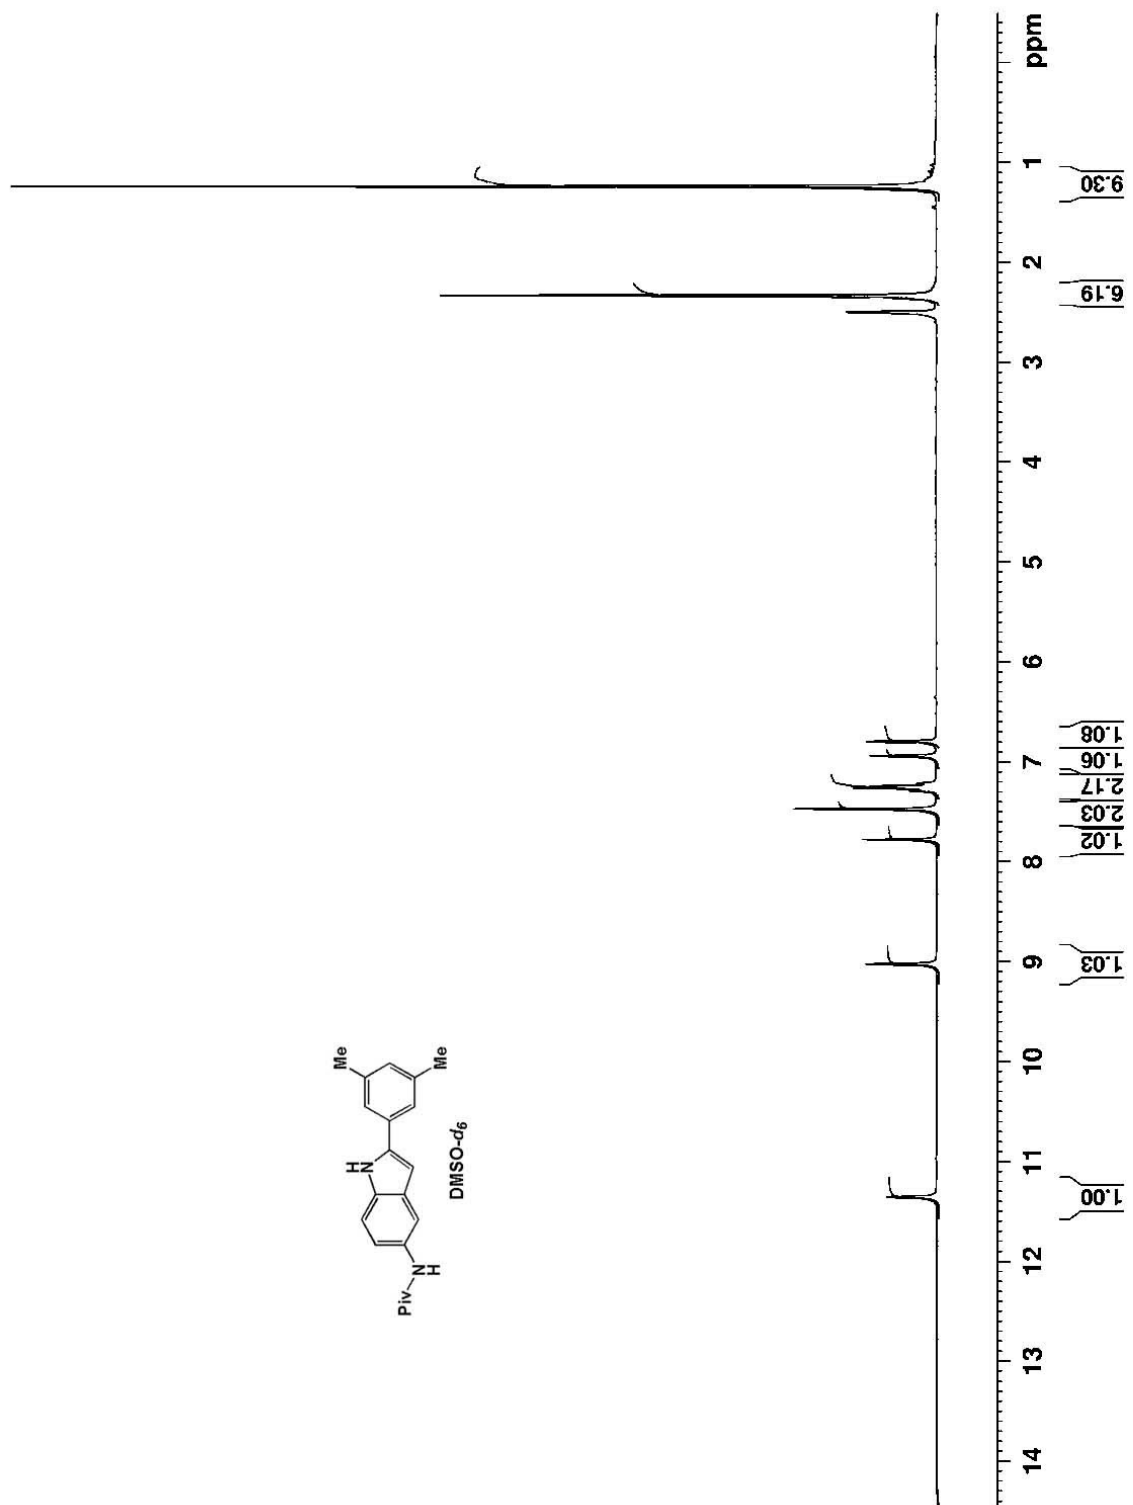

SW-I-196 nb300

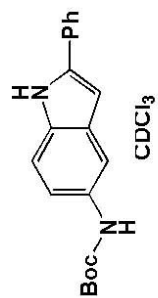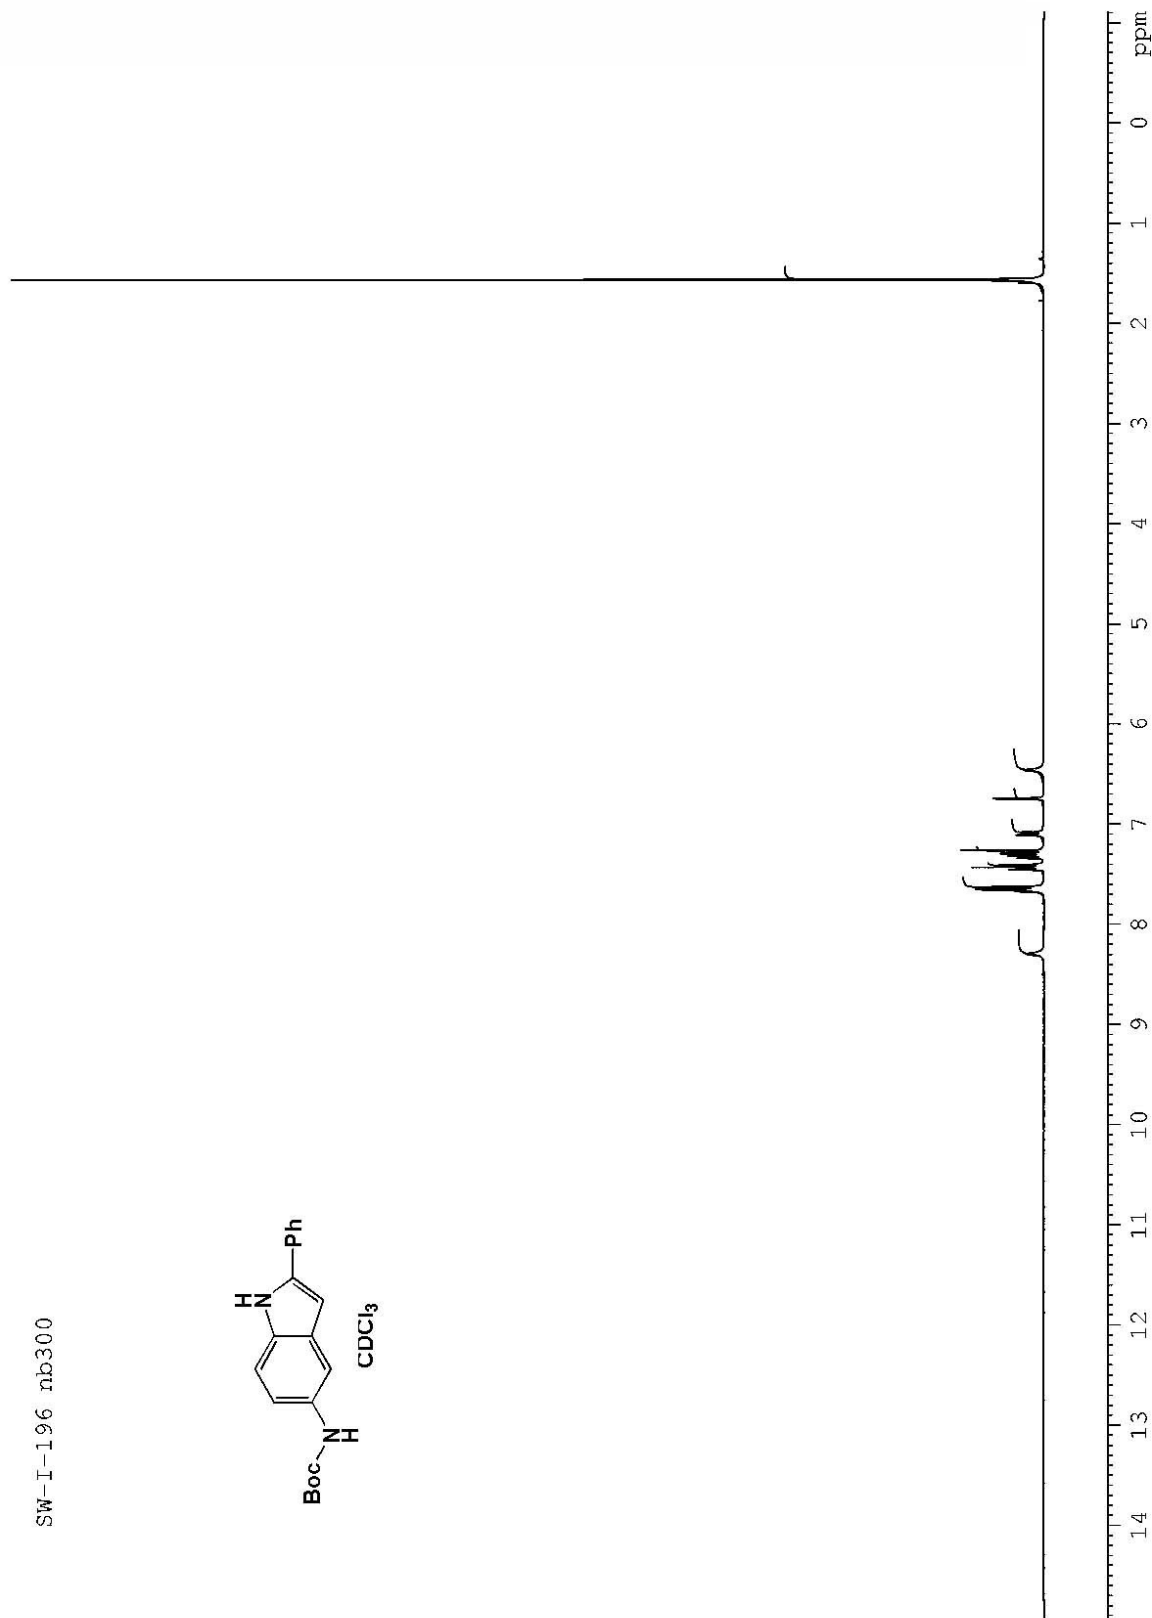

proton standard  
SW-I-209  
nb300

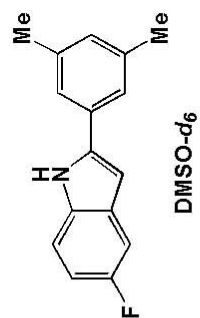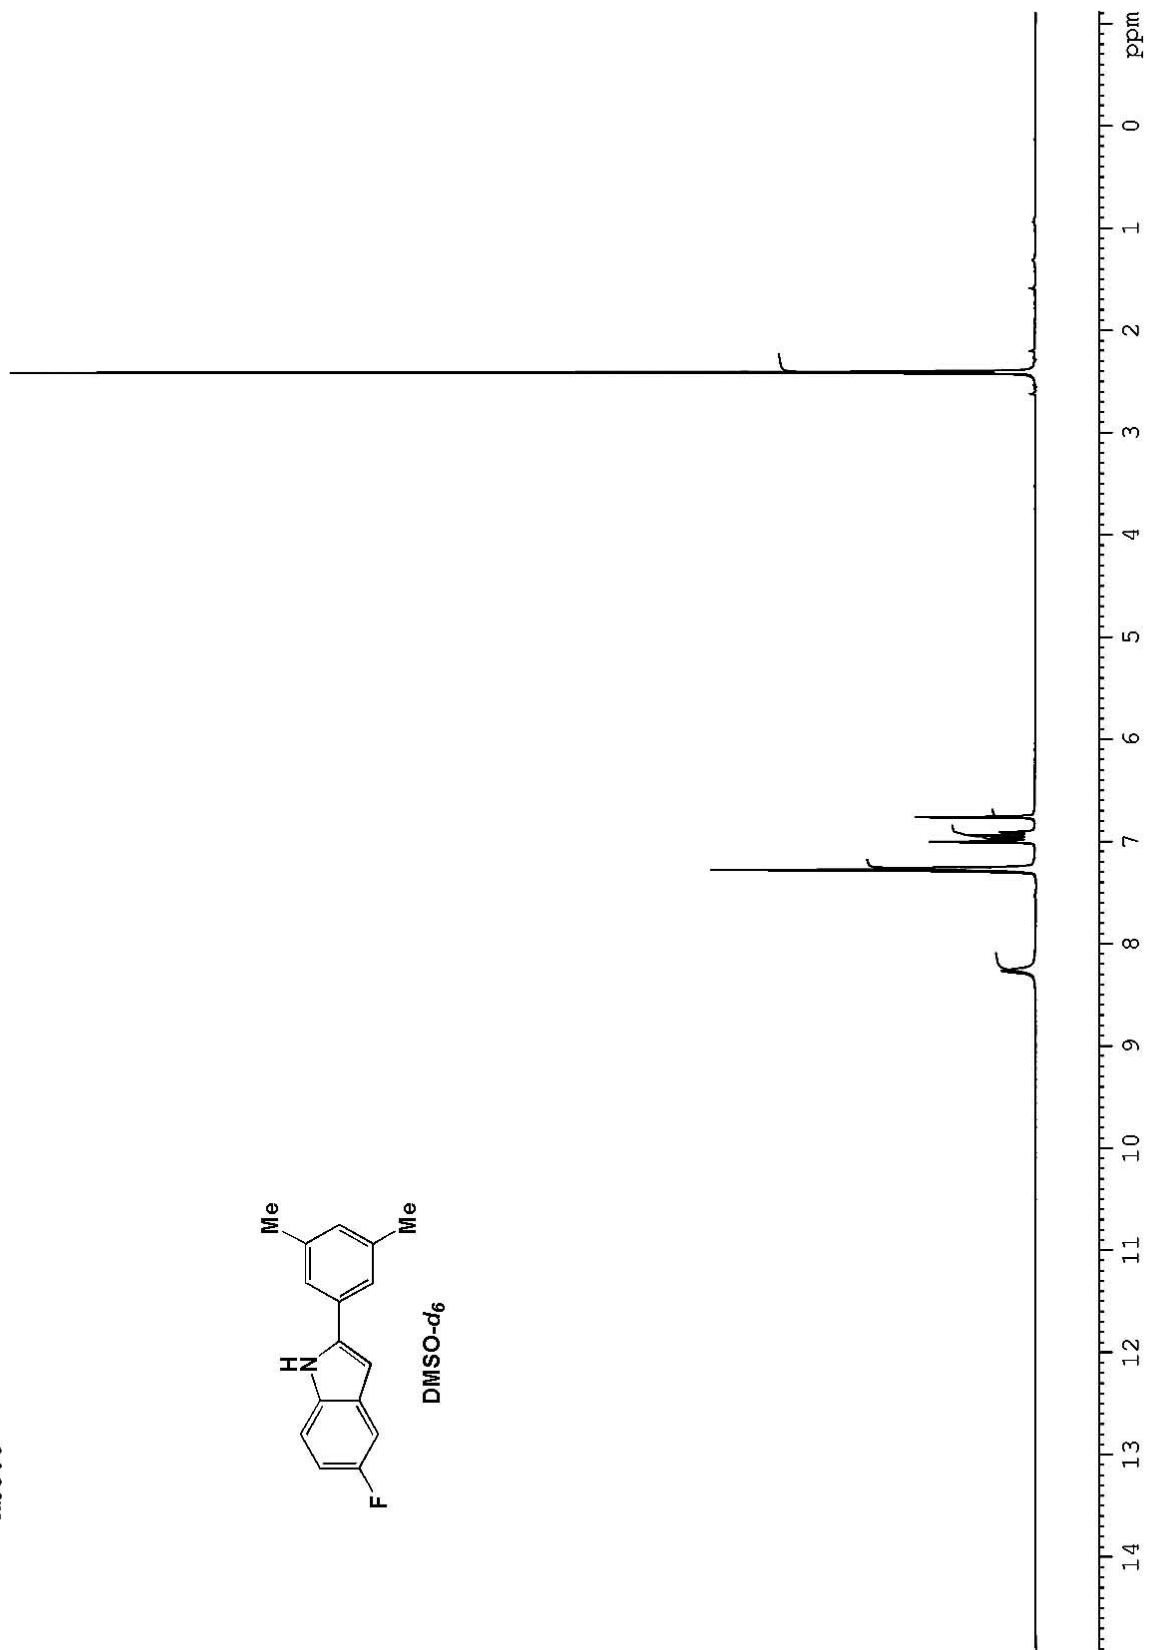

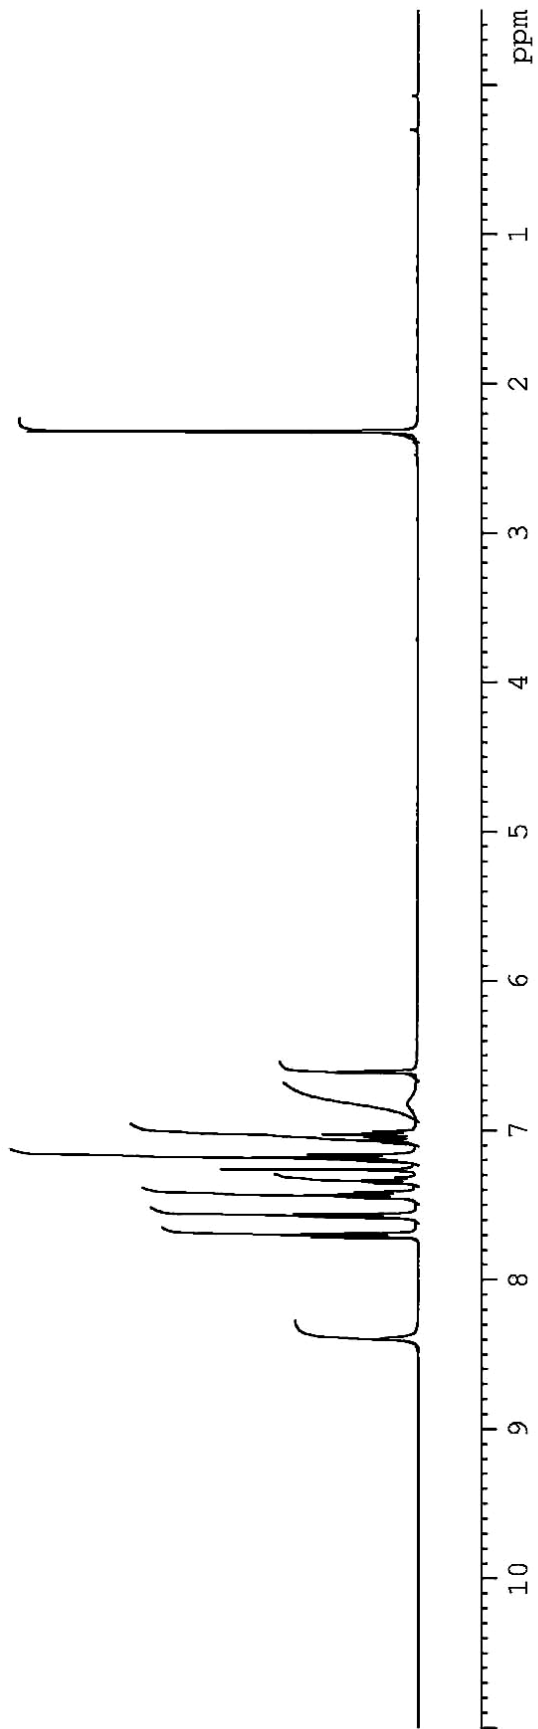

SW-I-211

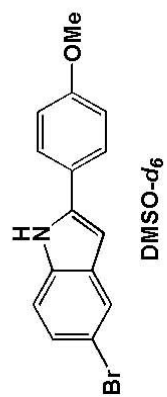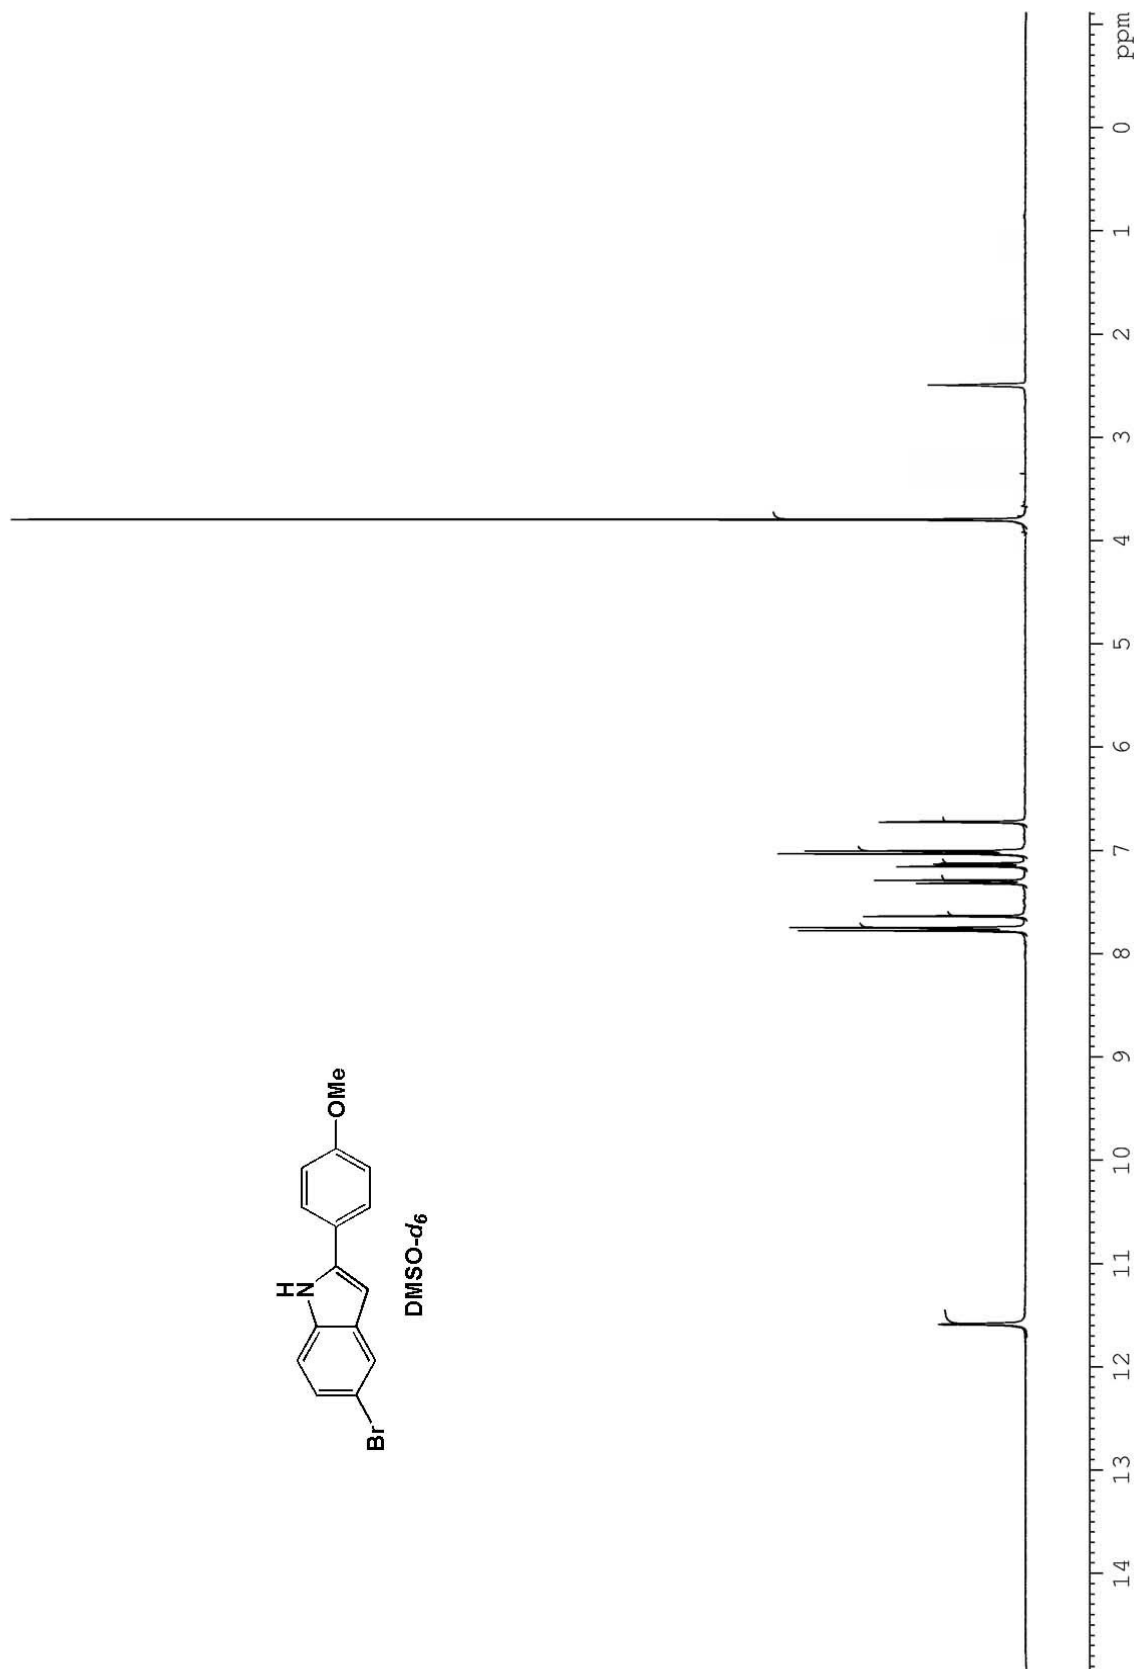

SW-I-220  
proton 400Mhz

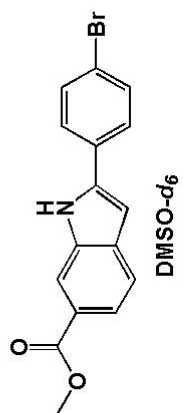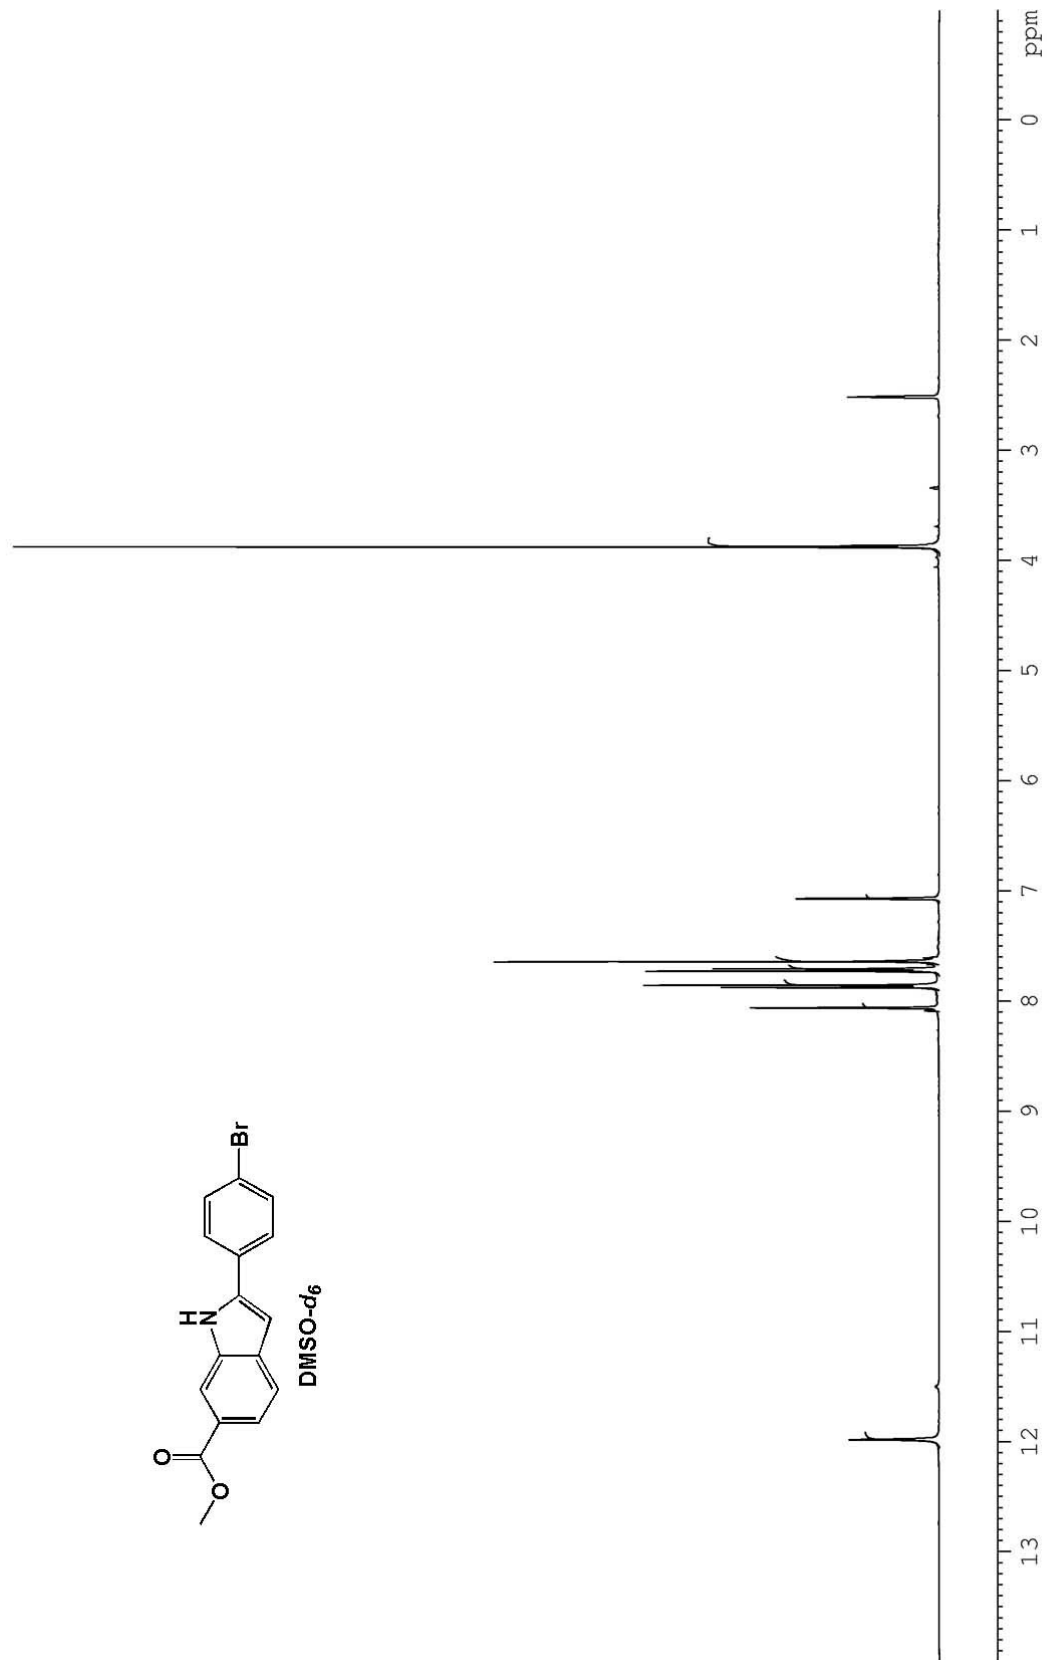

SW-I-89  
proton

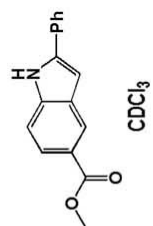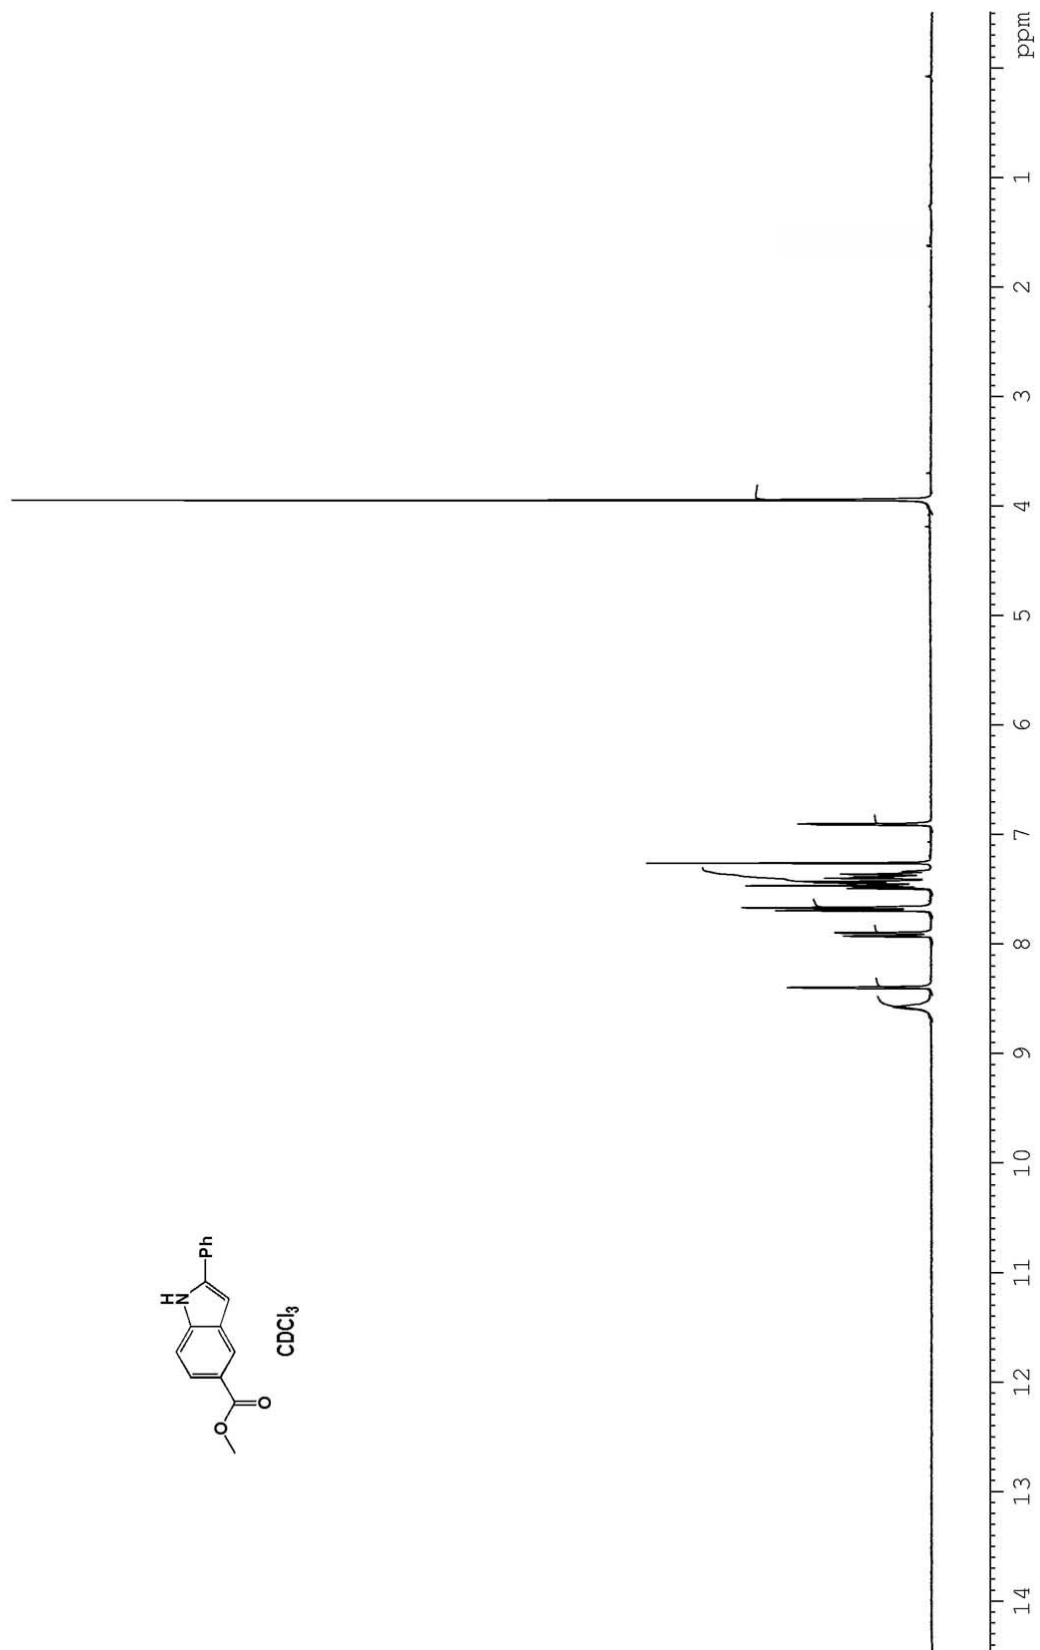

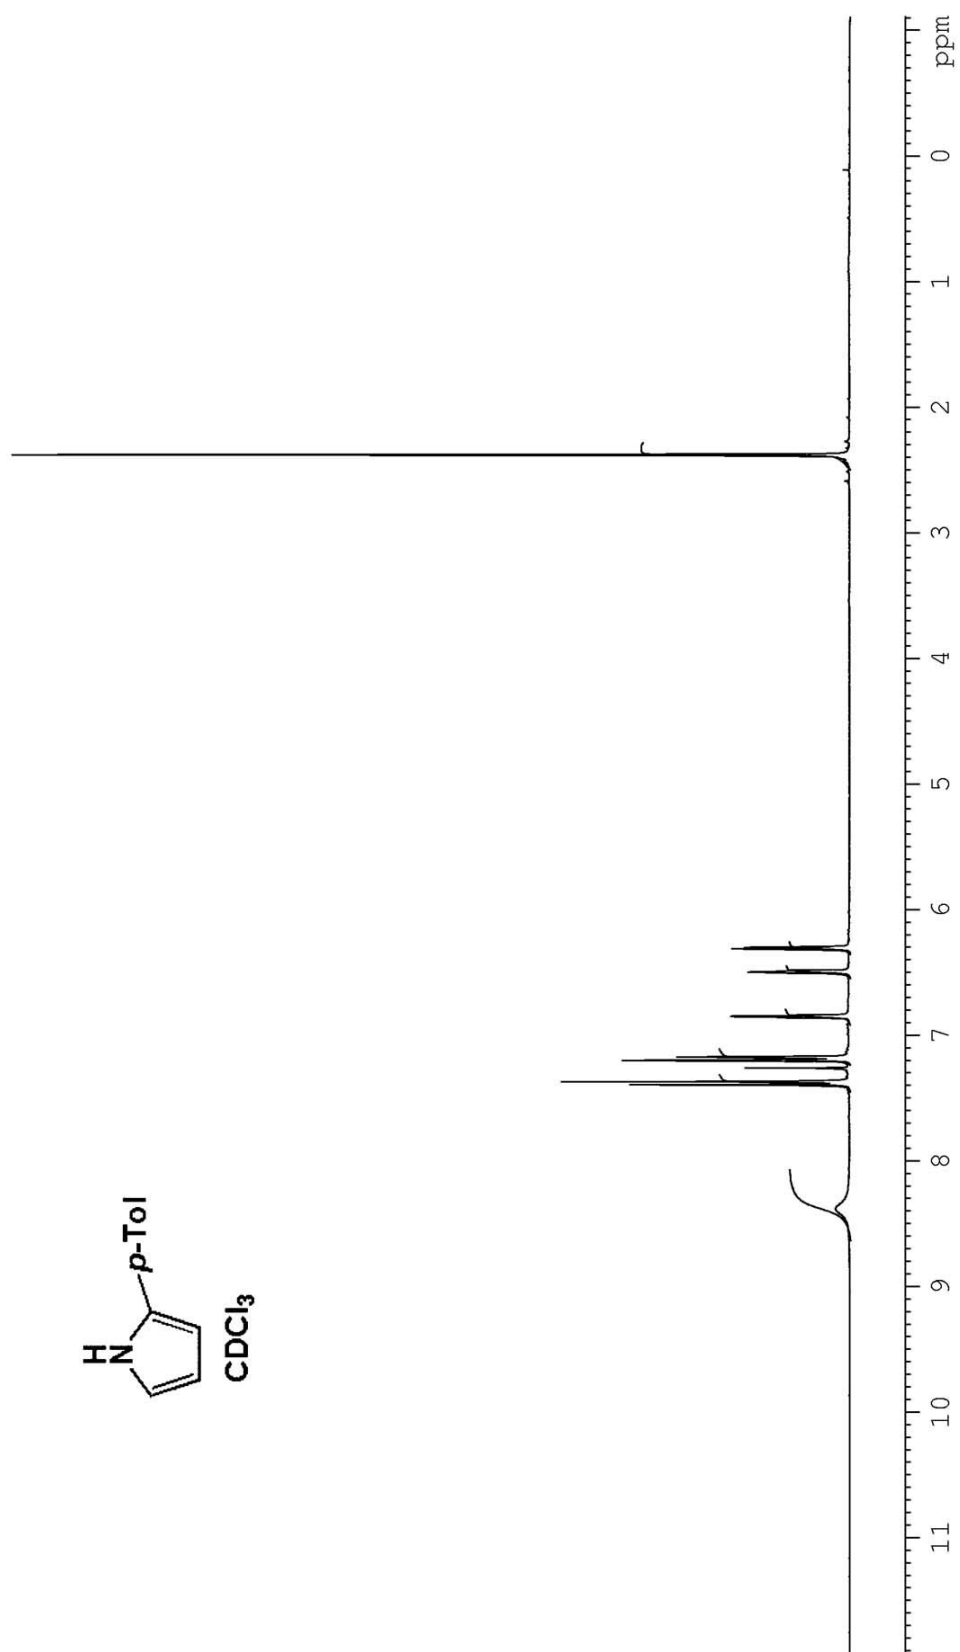

SW-I-143 proton

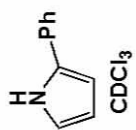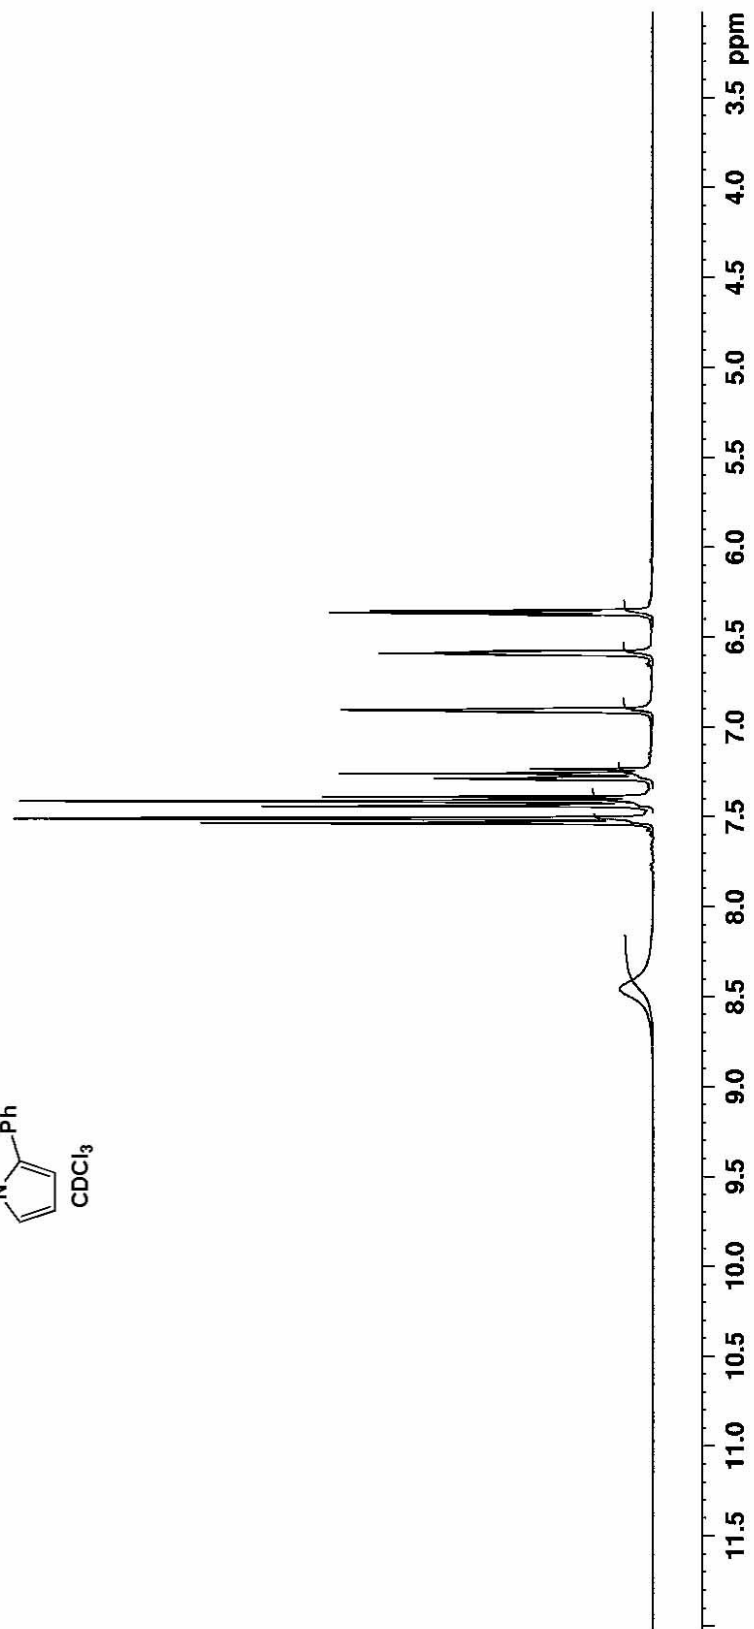

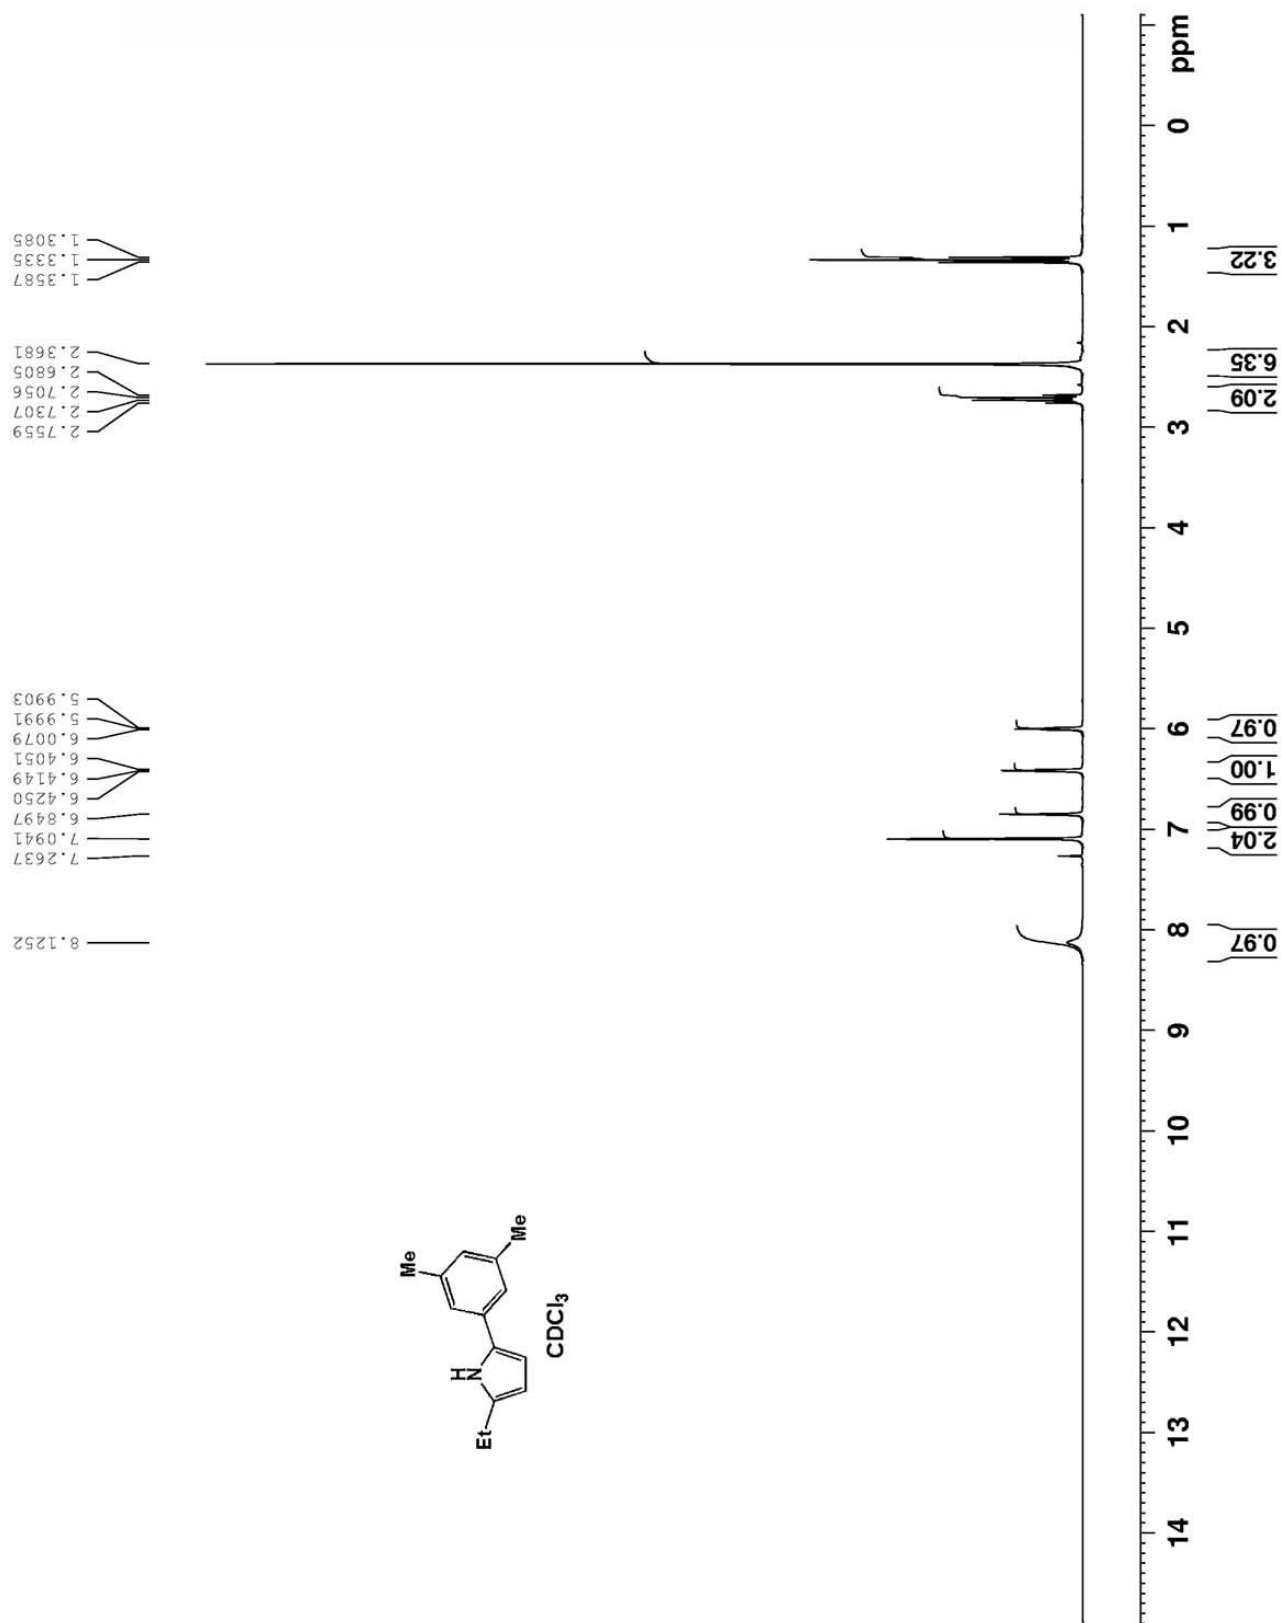

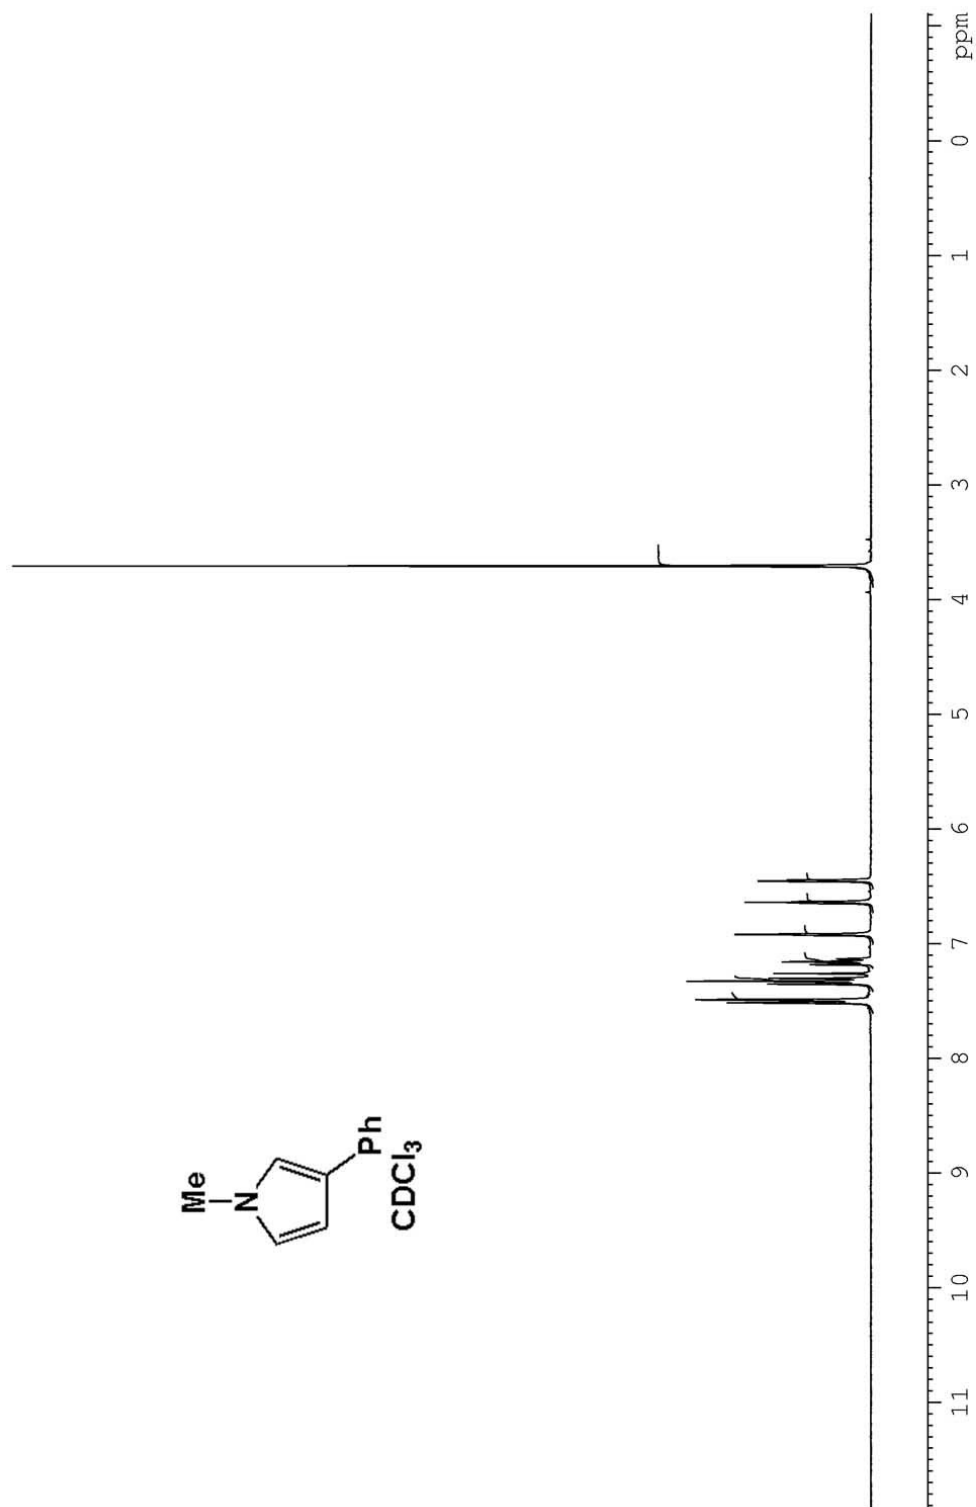

SW-110-1  
wb300  
proton standard

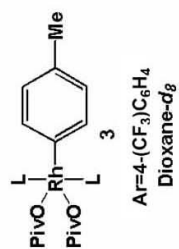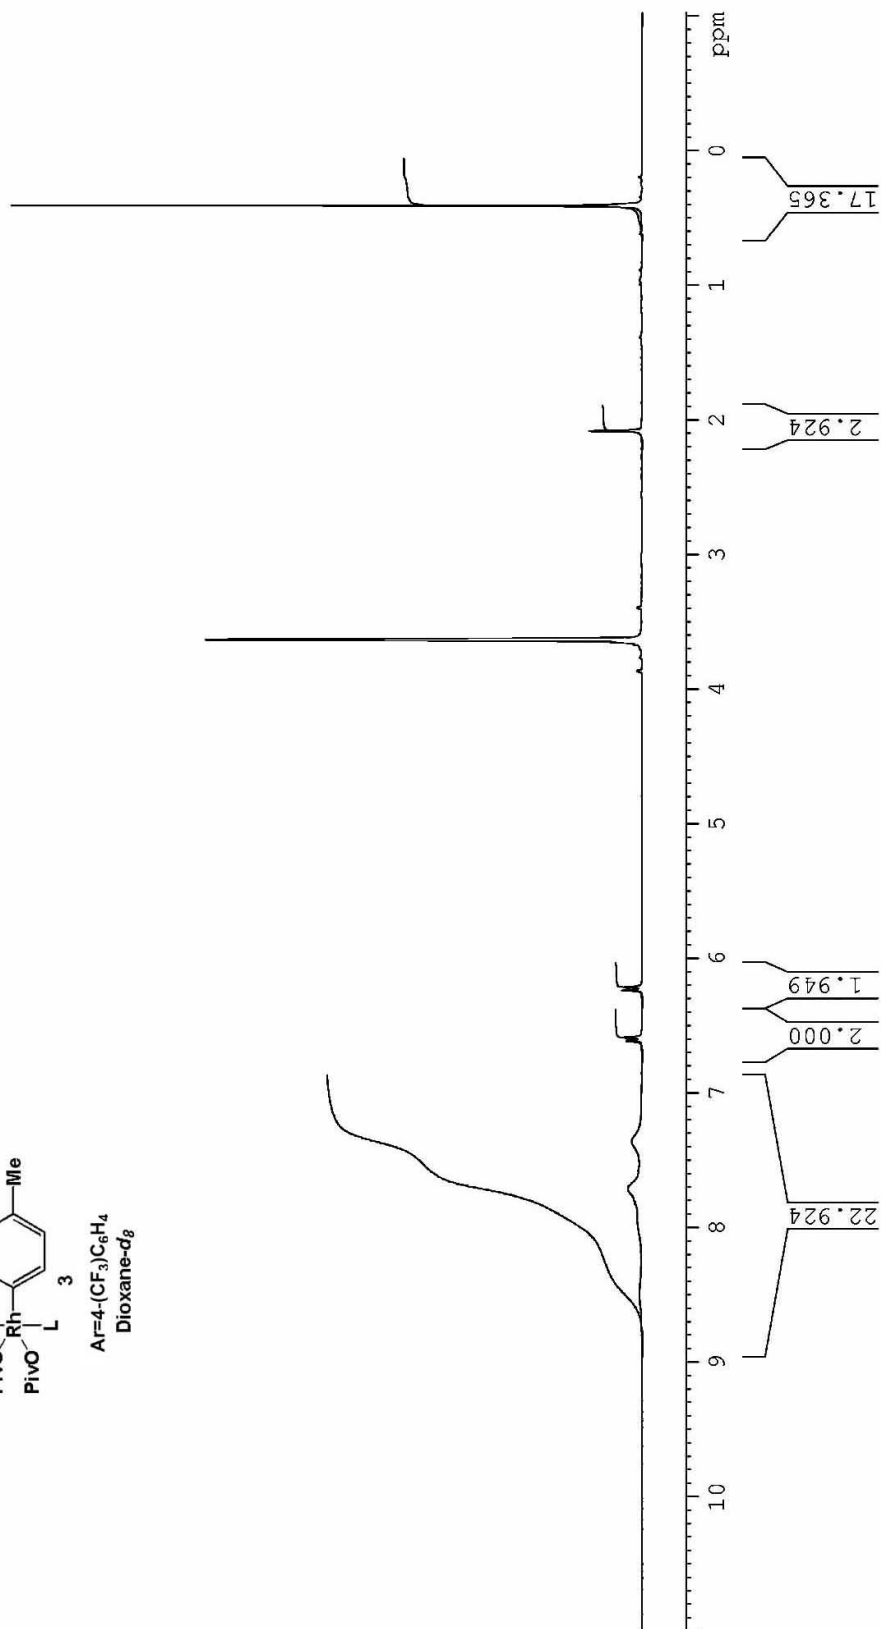

### Reference:

1. Suomalainen, P.; Reinius, H. K.; Riihimäki, H.; Laitinen, R. H.; Jaaskelainen, S.; Haukka, M.; Pursiainen, J. T.; Pakkanen, T. A.; Krause, A. O. I. *J. Mol. Cat. A* **2001**, *169*, 67-78.
2. Van der Ent, A.; Onderdelinden, A. L. *Inorg. Synth.* **1990**, *28*, 90-2.
3. Campo, M. A.; Larock, R. C. *Org. Lett.* **2000**, *2*, 3675-3677.
4. Bubnov, Y. N.; Zhun, I. V.; Klimkina, E. V.; Ignatenko, A. V.; Starikova, Z. A. *Eur. J. Org. Chem.* **2000**, 3323-3327.
5. Ibaceta-Lizana, J. S. L.; Jackson, A. H.; Prasitpan, N.; Shannon, P. V. R. *J. Chem. Soc., Perkin Trans. 2* **1987**, 1221-6.
6. Sezen, B.; Sames, D. *J. Am. Chem. Soc.* **2003**, *125*, 5274-5275.
7. Fagnola, M. C.; Candiani, I.; Visentin, G.; Cabri, W.; Zarini, F.; Mongelli, N.; Bedeschi, A. *Tetrahedron Lett.* **1997**, *38*, 2307-2310.
8. Katritzky, A. R.; Li, J.; Gordeev, M. F. *Synthesis* **1994**, 93-6.
9. Xu, Z.; Lu, X. *J. Org. Chem.* **1998**, *63*, 5031-5041.
10. Hickson, C. L.; McNab, H. *J. Chem. Soc., Perkin Trans. 1* **1988**, 339-42.
11. Bonnaud, B.; Bigg, D. C. H. *Synthesis* **1994**, 465-7.
